# Supplementary material for: Human disturbances and the daytime activity of sympatric otters along equatorial Amazonian rivers
Source: PeerJ. 2023 Jul 21;11:e15742. doi: 10.7717/peerj.15742 (PMC10364808; doi:10.7717/peerj.15742)
Supplement: Supplemental Information 1 [file peerj-11-15742-s001.xlsx]

## Sheet: readme_metadata
Article:	Human disturbances and the daytime activity of sympatric otters along equatorial Amazonian rivers
Supplemental material with data to generate figures and run analysis
Sheet name	Description
model_data	raw data
Column name	Column description
reach_id	Id code of each survey river reach.
long	Location of river reach center. Longitude. Decimal degrees. EPSG = 4326.
lat	Location of river reach center. Latitude. Decimal degrees. EPSG = 4326.
boat_flag	Reaches were classified by boat frequency (number of boats per survey km). Those with none or relatively few boats (less than 0.006 boats per survey km the 25% quantile of frequency values), intermediate (25 – 75% quantile range of frequency values) and many (greater than 0.08 boats per survey km the 75% quantile of boat frequency values).
net_flag	Presence or absence of fishing nets in the river reach.
river_use	Human river use intesity. Combination of boat frequency and net presence with four levels: few, intermediate no nets, intermediate with nets and many.
river_level	River levels grouped into four discrete values: “1”: low (September to November), “2”: rising (December, January, February), “3”: high (March to May) and “4”: decreasing (June to August).
ahour	Survey hour
ahour_3	Survey time in 3 hour bins.
effort_km	Effort (km).
ariranha_pa	Presence-absence. Were giant otters detected? 1 = yes, 0 = no.
lontra_pa	Presence-absence. Were neotropical otters detected? 1 = yes, 0 = no.

## Sheet: model_data
reach_id	long	lat	boat_flag	net_flag	river_use	river_level	ahour	ahour_3	effort_km	ariranha_pa	lontra_pa
3	-51.3579	0.775089	many	1	many	1	9	10	1.64469	0	0
3	-51.3579	0.775089	many	1	many	1	10	10	5.7921	0	0
3	-51.3579	0.775089	many	1	many	1	12	13	5.74219	0	0
3	-51.3579	0.775089	many	1	many	1	13	13	6.27284	0	0
3	-51.3579	0.775089	many	1	many	1	14	13	14.3651	0	0
3	-51.3579	0.775089	many	1	many	1	15	16	0.768226	0	0
3	-51.3579	0.775089	many	1	many	1	16	16	7.92227	0	0
3	-51.3579	0.775089	many	1	many	1	17	16	0.151174	0	0
3	-51.3579	0.775089	many	1	many	2	9	10	5.3104	0	0
3	-51.3579	0.775089	many	1	many	2	10	10	2.30461	0	0
3	-51.3579	0.775089	many	1	many	2	11	10	3.97912	0	0
3	-51.3579	0.775089	many	1	many	2	12	13	2.71244	0	0
3	-51.3579	0.775089	many	1	many	2	13	13	2.26757	0	0
3	-51.3579	0.775089	many	1	many	2	14	13	0.125345	0	0
3	-51.3579	0.775089	many	1	many	3	9	10	1.33841	0	0
3	-51.3579	0.775089	many	1	many	3	11	10	11.0422	0	0
3	-51.3579	0.775089	many	1	many	3	12	13	2.26971	0	1
3	-51.3579	0.775089	many	1	many	3	13	13	3.76448	0	0
3	-51.3579	0.775089	many	1	many	4	9	10	0.0264053	0	0
3	-51.3579	0.775089	many	1	many	4	10	10	7.75165	0	0
3	-51.3579	0.775089	many	1	many	4	11	10	0.701191	0	0
3	-51.3579	0.775089	many	1	many	4	12	13	4.69587	0	0
3	-51.3579	0.775089	many	1	many	4	13	13	4.4934	0	0
3	-51.3579	0.775089	many	1	many	4	14	13	4.58932	0	0
3	-51.3579	0.775089	many	1	many	4	15	16	1.41142	0	0
4	-51.3741	0.741146	many	1	many	1	7	7	8.15327	0	0
4	-51.3741	0.741146	many	1	many	1	8	7	14.2772	0	1
4	-51.3741	0.741146	many	1	many	1	9	10	12.8353	0	0
4	-51.3741	0.741146	many	1	many	1	10	10	11.9323	0	0
4	-51.3741	0.741146	many	1	many	1	11	10	14.4948	0	0
4	-51.3741	0.741146	many	1	many	1	12	13	17.3519	0	0
4	-51.3741	0.741146	many	1	many	1	13	13	24.4768	0	0
4	-51.3741	0.741146	many	1	many	1	14	13	34.6529	0	0
4	-51.3741	0.741146	many	1	many	1	15	16	18.5955	0	0
4	-51.3741	0.741146	many	1	many	1	16	16	11.8021	0	0
4	-51.3741	0.741146	many	1	many	1	17	16	8.899	0	0
4	-51.3741	0.741146	many	1	many	2	8	7	5.38457	0	0
4	-51.3741	0.741146	many	1	many	2	9	10	5.16377	0	0
4	-51.3741	0.741146	many	1	many	2	10	10	7.85346	0	0
4	-51.3741	0.741146	many	1	many	2	11	10	14.2985	0	1
4	-51.3741	0.741146	many	1	many	2	12	13	13.5599	0	0
4	-51.3741	0.741146	many	1	many	2	13	13	11.3648	0	0
4	-51.3741	0.741146	many	1	many	2	14	13	6.69033	0	0
4	-51.3741	0.741146	many	1	many	2	15	16	0.268454	0	0
4	-51.3741	0.741146	many	1	many	2	16	16	0.386652	0	0
4	-51.3741	0.741146	many	1	many	3	8	7	3.15961	0	0
4	-51.3741	0.741146	many	1	many	3	9	10	1.60561	0	0
4	-51.3741	0.741146	many	1	many	3	10	10	4.30176	0	0
4	-51.3741	0.741146	many	1	many	3	11	10	27.2058	0	0
4	-51.3741	0.741146	many	1	many	3	12	13	12.4398	0	0
4	-51.3741	0.741146	many	1	many	3	13	13	10.2022	0	0
4	-51.3741	0.741146	many	1	many	3	14	13	4.21739	0	0
4	-51.3741	0.741146	many	1	many	3	15	16	1.54137	0	0
4	-51.3741	0.741146	many	1	many	4	9	10	9.36703	0	0
4	-51.3741	0.741146	many	1	many	4	10	10	7.12854	0	1
4	-51.3741	0.741146	many	1	many	4	11	10	13.3453	0	0
4	-51.3741	0.741146	many	1	many	4	12	13	6.87552	0	0
4	-51.3741	0.741146	many	1	many	4	13	13	19.0373	0	0
4	-51.3741	0.741146	many	1	many	4	14	13	8.77553	0	0
4	-51.3741	0.741146	many	1	many	4	15	16	3.40962	0	0
5	-51.4136	0.71866	many	1	many	1	6	7	0.0294962	0	0
5	-51.4136	0.71866	many	1	many	1	7	7	4.09961	0	0
5	-51.4136	0.71866	many	1	many	1	8	7	6.06087	0	0
5	-51.4136	0.71866	many	1	many	1	9	10	11.1783	0	0
5	-51.4136	0.71866	many	1	many	1	10	10	18.0059	0	0
5	-51.4136	0.71866	many	1	many	1	11	10	25.6933	0	0
5	-51.4136	0.71866	many	1	many	1	12	13	29.0631	0	0
5	-51.4136	0.71866	many	1	many	1	13	13	37.169	0	0
5	-51.4136	0.71866	many	1	many	1	14	13	14.0301	0	0
5	-51.4136	0.71866	many	1	many	1	15	16	15.5376	0	0
5	-51.4136	0.71866	many	1	many	1	16	16	5.40104	0	0
5	-51.4136	0.71866	many	1	many	1	17	16	9.25845	0	0
5	-51.4136	0.71866	many	1	many	2	7	7	1.8541	0	0
5	-51.4136	0.71866	many	1	many	2	8	7	8.04601	0	0
5	-51.4136	0.71866	many	1	many	2	9	10	0.391545	0	0
5	-51.4136	0.71866	many	1	many	2	10	10	3.84577	0	0
5	-51.4136	0.71866	many	1	many	2	11	10	7.01395	0	0
5	-51.4136	0.71866	many	1	many	2	12	13	12.5787	0	0
5	-51.4136	0.71866	many	1	many	2	13	13	12.0442	0	0
5	-51.4136	0.71866	many	1	many	2	14	13	12.6729	0	0
5	-51.4136	0.71866	many	1	many	2	15	16	6.59469	0	0
5	-51.4136	0.71866	many	1	many	2	16	16	4.61725	0	0
5	-51.4136	0.71866	many	1	many	2	17	16	0.88448	0	0
5	-51.4136	0.71866	many	1	many	3	8	7	2.95508	0	0
5	-51.4136	0.71866	many	1	many	3	9	10	2.35967	0	0
5	-51.4136	0.71866	many	1	many	3	10	10	24.5334	0	0
5	-51.4136	0.71866	many	1	many	3	11	10	14.8399	0	0
5	-51.4136	0.71866	many	1	many	3	12	13	19.0037	0	0
5	-51.4136	0.71866	many	1	many	3	13	13	6.36685	0	0
5	-51.4136	0.71866	many	1	many	3	14	13	15.2932	0	0
5	-51.4136	0.71866	many	1	many	3	15	16	1.57368	0	0
5	-51.4136	0.71866	many	1	many	4	9	10	5.41817	0	0
5	-51.4136	0.71866	many	1	many	4	11	10	24.2542	0	0
5	-51.4136	0.71866	many	1	many	4	12	13	10.8644	0	0
5	-51.4136	0.71866	many	1	many	4	13	13	15.8206	0	0
5	-51.4136	0.71866	many	1	many	4	14	13	10.8197	0	0
5	-51.4136	0.71866	many	1	many	4	15	16	4.50434	0	0
6	-51.456	0.717583	many	1	many	1	8	7	2.11207	0	0
6	-51.456	0.717583	many	1	many	1	9	10	1.93584	0	0
6	-51.456	0.717583	many	1	many	1	10	10	14.6982	0	0
6	-51.456	0.717583	many	1	many	1	11	10	19.9709	0	0
6	-51.456	0.717583	many	1	many	1	12	13	25.1376	0	0
6	-51.456	0.717583	many	1	many	1	13	13	21.3797	0	0
6	-51.456	0.717583	many	1	many	1	14	13	22.188	0	0
6	-51.456	0.717583	many	1	many	1	15	16	6.04377	0	0
6	-51.456	0.717583	many	1	many	1	16	16	0.91323	0	0
6	-51.456	0.717583	many	1	many	1	17	16	1.89692	0	0
6	-51.456	0.717583	many	1	many	2	7	7	0.838935	0	0
6	-51.456	0.717583	many	1	many	2	8	7	0.030314	0	0
6	-51.456	0.717583	many	1	many	2	11	10	3.41781	0	1
6	-51.456	0.717583	many	1	many	2	12	13	8.86735	0	1
6	-51.456	0.717583	many	1	many	2	13	13	8.18987	0	0
6	-51.456	0.717583	many	1	many	2	14	13	14.2545	0	0
6	-51.456	0.717583	many	1	many	2	16	16	2.99806	0	0
6	-51.456	0.717583	many	1	many	2	17	16	1.10682	0	0
6	-51.456	0.717583	many	1	many	3	9	10	8.64403	0	0
6	-51.456	0.717583	many	1	many	3	10	10	27.414	0	0
6	-51.456	0.717583	many	1	many	3	11	10	6.4937	0	0
6	-51.456	0.717583	many	1	many	3	12	13	25.5987	0	0
6	-51.456	0.717583	many	1	many	3	13	13	12.1599	0	0
6	-51.456	0.717583	many	1	many	3	14	13	13.4871	0	0
6	-51.456	0.717583	many	1	many	3	15	16	5.4496	0	0
6	-51.456	0.717583	many	1	many	4	10	10	6.02469	0	0
6	-51.456	0.717583	many	1	many	4	11	10	13.6148	0	0
6	-51.456	0.717583	many	1	many	4	12	13	5.52521	0	0
6	-51.456	0.717583	many	1	many	4	13	13	14.0415	0	0
6	-51.456	0.717583	many	1	many	4	14	13	17.6994	0	0
6	-51.456	0.717583	many	1	many	4	15	16	5.03446	0	0
7	-51.4785	0.742287	many	1	many	1	8	7	0.422875	0	0
7	-51.4785	0.742287	many	1	many	1	9	10	9.0106	0	0
7	-51.4785	0.742287	many	1	many	1	10	10	13.9228	0	0
7	-51.4785	0.742287	many	1	many	1	11	10	23.8215	0	0
7	-51.4785	0.742287	many	1	many	1	12	13	3.44984	0	0
7	-51.4785	0.742287	many	1	many	1	13	13	17.8952	0	0
7	-51.4785	0.742287	many	1	many	1	14	13	9.90209	0	0
7	-51.4785	0.742287	many	1	many	1	15	16	19.3952	0	0
7	-51.4785	0.742287	many	1	many	1	16	16	9.8359	0	0
7	-51.4785	0.742287	many	1	many	1	17	16	1.61103	0	0
7	-51.4785	0.742287	many	1	many	2	8	7	3.44811	0	0
7	-51.4785	0.742287	many	1	many	2	9	10	2.84929	0	0
7	-51.4785	0.742287	many	1	many	2	11	10	18.7829	0	0
7	-51.4785	0.742287	many	1	many	2	12	13	2.25151	0	1
7	-51.4785	0.742287	many	1	many	2	13	13	5.1683	0	0
7	-51.4785	0.742287	many	1	many	2	14	13	11.4162	0	0
7	-51.4785	0.742287	many	1	many	3	8	7	1.48143	0	0
7	-51.4785	0.742287	many	1	many	3	9	10	24.8835	0	0
7	-51.4785	0.742287	many	1	many	3	10	10	6.07803	0	0
7	-51.4785	0.742287	many	1	many	3	11	10	10.7671	0	0
7	-51.4785	0.742287	many	1	many	3	12	13	11.8474	0	0
7	-51.4785	0.742287	many	1	many	3	13	13	31.044	0	0
7	-51.4785	0.742287	many	1	many	3	14	13	8.24609	0	0
7	-51.4785	0.742287	many	1	many	3	15	16	11.4779	0	0
7	-51.4785	0.742287	many	1	many	3	16	16	2.54175	0	0
7	-51.4785	0.742287	many	1	many	4	10	10	10.2555	0	0
7	-51.4785	0.742287	many	1	many	4	11	10	8.66619	0	0
7	-51.4785	0.742287	many	1	many	4	12	13	6.29805	0	0
7	-51.4785	0.742287	many	1	many	4	13	13	13.6867	0	0
7	-51.4785	0.742287	many	1	many	4	14	13	14.403	0	0
7	-51.4785	0.742287	many	1	many	4	15	16	8.01149	0	0
7	-51.4785	0.742287	many	1	many	4	16	16	3.05769	0	0
8	-51.5257	0.738602	many	1	many	1	8	7	0.232479	0	0
8	-51.5257	0.738602	many	1	many	1	9	10	12.1495	0	0
8	-51.5257	0.738602	many	1	many	1	10	10	15.5554	0	1
8	-51.5257	0.738602	many	1	many	1	11	10	10.9297	0	0
8	-51.5257	0.738602	many	1	many	1	12	13	13.0323	0	0
8	-51.5257	0.738602	many	1	many	1	13	13	10.7459	0	0
8	-51.5257	0.738602	many	1	many	1	14	13	11.7616	0	0
8	-51.5257	0.738602	many	1	many	1	15	16	12.9157	0	0
8	-51.5257	0.738602	many	1	many	1	16	16	11.9619	0	0
8	-51.5257	0.738602	many	1	many	1	17	16	2.90117	0	0
8	-51.5257	0.738602	many	1	many	2	9	10	5.67822	0	0
8	-51.5257	0.738602	many	1	many	2	10	10	3.6115	0	0
8	-51.5257	0.738602	many	1	many	2	11	10	18.4743	0	0
8	-51.5257	0.738602	many	1	many	2	12	13	3.06313	0	0
8	-51.5257	0.738602	many	1	many	2	13	13	5.3955	0	0
8	-51.5257	0.738602	many	1	many	2	14	13	2.29309	0	0
8	-51.5257	0.738602	many	1	many	2	15	16	6.09743	0	0
8	-51.5257	0.738602	many	1	many	3	8	7	9.59136	0	0
8	-51.5257	0.738602	many	1	many	3	9	10	21.6018	0	0
8	-51.5257	0.738602	many	1	many	3	10	10	7.43778	0	0
8	-51.5257	0.738602	many	1	many	3	11	10	7.89483	0	0
8	-51.5257	0.738602	many	1	many	3	12	13	12.2859	0	0
8	-51.5257	0.738602	many	1	many	3	13	13	29.7792	0	1
8	-51.5257	0.738602	many	1	many	3	14	13	17.0915	0	0
8	-51.5257	0.738602	many	1	many	3	15	16	3.15047	0	0
8	-51.5257	0.738602	many	1	many	3	16	16	1.46527	0	0
8	-51.5257	0.738602	many	1	many	4	9	10	9.17844	0	0
8	-51.5257	0.738602	many	1	many	4	10	10	4.26581	0	0
8	-51.5257	0.738602	many	1	many	4	11	10	7.92627	0	0
8	-51.5257	0.738602	many	1	many	4	12	13	11.6192	0	0
8	-51.5257	0.738602	many	1	many	4	13	13	5.69007	0	0
8	-51.5257	0.738602	many	1	many	4	14	13	17.1257	0	0
8	-51.5257	0.738602	many	1	many	4	15	16	14.5663	0	0
8	-51.5257	0.738602	many	1	many	4	16	16	5.00473	0	0
8	-51.5257	0.738602	many	1	many	4	17	16	1.1958	0	0
9	-51.5612	0.737694	many	1	many	1	8	7	2.44337	0	0
9	-51.5612	0.737694	many	1	many	1	9	10	16.5594	0	0
9	-51.5612	0.737694	many	1	many	1	10	10	31.0013	0	0
9	-51.5612	0.737694	many	1	many	1	11	10	3.88906	0	0
9	-51.5612	0.737694	many	1	many	1	12	13	19.7262	0	0
9	-51.5612	0.737694	many	1	many	1	13	13	1.83232	0	0
9	-51.5612	0.737694	many	1	many	1	14	13	10.7363	0	0
9	-51.5612	0.737694	many	1	many	1	15	16	7.71875	0	0
9	-51.5612	0.737694	many	1	many	1	16	16	4.70279	0	0
9	-51.5612	0.737694	many	1	many	2	9	10	0.638646	0	0
9	-51.5612	0.737694	many	1	many	2	10	10	27.6751	0	0
9	-51.5612	0.737694	many	1	many	2	11	10	8.00595	0	0
9	-51.5612	0.737694	many	1	many	2	12	13	9.08354	0	0
9	-51.5612	0.737694	many	1	many	2	13	13	0.652867	0	0
9	-51.5612	0.737694	many	1	many	2	15	16	7.62748	0	0
9	-51.5612	0.737694	many	1	many	3	9	10	5.093	0	0
9	-51.5612	0.737694	many	1	many	3	10	10	12.9026	0	0
9	-51.5612	0.737694	many	1	many	3	11	10	10.1225	0	0
9	-51.5612	0.737694	many	1	many	3	12	13	5.26466	0	0
9	-51.5612	0.737694	many	1	many	3	13	13	18.3927	0	0
9	-51.5612	0.737694	many	1	many	3	14	13	22.6145	0	0
9	-51.5612	0.737694	many	1	many	3	15	16	20.9278	0	0
9	-51.5612	0.737694	many	1	many	4	9	10	5.01917	0	0
9	-51.5612	0.737694	many	1	many	4	10	10	10.4861	0	0
9	-51.5612	0.737694	many	1	many	4	11	10	12.6417	0	0
9	-51.5612	0.737694	many	1	many	4	12	13	13.0859	0	0
9	-51.5612	0.737694	many	1	many	4	13	13	8.73671	0	0
9	-51.5612	0.737694	many	1	many	4	14	13	7.98041	0	0
9	-51.5612	0.737694	many	1	many	4	15	16	9.16886	0	0
9	-51.5612	0.737694	many	1	many	4	16	16	5.29946	0	0
10	-51.5832	0.754319	many	1	many	1	8	7	5.67625	0	0
10	-51.5832	0.754319	many	1	many	1	9	10	30.8422	0	0
10	-51.5832	0.754319	many	1	many	1	10	10	25.0345	1	0
10	-51.5832	0.754319	many	1	many	1	11	10	12.012	1	0
10	-51.5832	0.754319	many	1	many	1	12	13	6.07491	0	0
10	-51.5832	0.754319	many	1	many	1	13	13	6.65342	0	0
10	-51.5832	0.754319	many	1	many	1	14	13	6.15419	0	0
10	-51.5832	0.754319	many	1	many	1	15	16	6.20519	0	0
10	-51.5832	0.754319	many	1	many	1	16	16	9.30302	0	0
10	-51.5832	0.754319	many	1	many	2	9	10	5.08989	0	0
10	-51.5832	0.754319	many	1	many	2	10	10	28.1248	0	0
10	-51.5832	0.754319	many	1	many	2	11	10	6.59839	0	0
10	-51.5832	0.754319	many	1	many	2	12	13	3.72252	0	0
10	-51.5832	0.754319	many	1	many	2	13	13	6	0	0
10	-51.5832	0.754319	many	1	many	2	15	16	1.34656	0	0
10	-51.5832	0.754319	many	1	many	2	16	16	5.51089	0	0
10	-51.5832	0.754319	many	1	many	3	9	10	13.5095	0	0
10	-51.5832	0.754319	many	1	many	3	10	10	13.5618	0	0
10	-51.5832	0.754319	many	1	many	3	11	10	4.92949	0	0
10	-51.5832	0.754319	many	1	many	3	12	13	9.90707	0	0
10	-51.5832	0.754319	many	1	many	3	13	13	6.47156	0	0
10	-51.5832	0.754319	many	1	many	3	14	13	24.5528	0	0
10	-51.5832	0.754319	many	1	many	3	15	16	18.8324	0	0
10	-51.5832	0.754319	many	1	many	3	16	16	1.88765	0	0
10	-51.5832	0.754319	many	1	many	4	8	7	3.88788	0	0
10	-51.5832	0.754319	many	1	many	4	9	10	4.03763	0	0
10	-51.5832	0.754319	many	1	many	4	10	10	31.6386	0	0
10	-51.5832	0.754319	many	1	many	4	11	10	5.53447	0	0
10	-51.5832	0.754319	many	1	many	4	12	13	4.45637	0	0
10	-51.5832	0.754319	many	1	many	4	13	13	12.486	0	0
10	-51.5832	0.754319	many	1	many	4	14	13	6.865	0	0
10	-51.5832	0.754319	many	1	many	4	15	16	7.99533	0	0
10	-51.5832	0.754319	many	1	many	4	16	16	4.41356	0	0
10	-51.5832	0.754319	many	1	many	4	17	16	0.0160745	0	0
11	-51.603	0.786573	many	1	many	1	7	7	3.02444	0	0
11	-51.603	0.786573	many	1	many	1	8	7	13.8562	0	0
11	-51.603	0.786573	many	1	many	1	9	10	36.3786	0	0
11	-51.603	0.786573	many	1	many	1	10	10	6.77791	0	0
11	-51.603	0.786573	many	1	many	1	11	10	18.9508	0	0
11	-51.603	0.786573	many	1	many	1	12	13	1.84878	0	0
11	-51.603	0.786573	many	1	many	1	13	13	10.6632	0	0
11	-51.603	0.786573	many	1	many	1	14	13	2.3	0	0
11	-51.603	0.786573	many	1	many	1	15	16	10.5359	0	0
11	-51.603	0.786573	many	1	many	1	16	16	7.19903	0	0
11	-51.603	0.786573	many	1	many	1	17	16	3.72367	0	0
11	-51.603	0.786573	many	1	many	2	9	10	25.0887	0	0
11	-51.603	0.786573	many	1	many	2	10	10	16.8429	0	0
11	-51.603	0.786573	many	1	many	2	13	13	5.411	0	0
11	-51.603	0.786573	many	1	many	2	15	16	0.472821	0	0
11	-51.603	0.786573	many	1	many	2	16	16	6.85074	0	0
11	-51.603	0.786573	many	1	many	2	17	16	2.60787	0	0
11	-51.603	0.786573	many	1	many	3	8	7	4.083	0	0
11	-51.603	0.786573	many	1	many	3	9	10	21.8684	0	0
11	-51.603	0.786573	many	1	many	3	10	10	8.05528	0	0
11	-51.603	0.786573	many	1	many	3	11	10	5.32034	0	0
11	-51.603	0.786573	many	1	many	3	12	13	1.42	0	0
11	-51.603	0.786573	many	1	many	3	13	13	8.89719	0	0
11	-51.603	0.786573	many	1	many	3	14	13	15.3137	0	0
11	-51.603	0.786573	many	1	many	3	15	16	16.5332	0	0
11	-51.603	0.786573	many	1	many	3	16	16	4.19798	0	0
11	-51.603	0.786573	many	1	many	4	8	7	5.32995	0	0
11	-51.603	0.786573	many	1	many	4	9	10	29.2329	0	0
11	-51.603	0.786573	many	1	many	4	10	10	16.3888	0	0
11	-51.603	0.786573	many	1	many	4	11	10	4.37196	0	0
11	-51.603	0.786573	many	1	many	4	13	13	11.701	0	0
11	-51.603	0.786573	many	1	many	4	14	13	2.346	0	0
11	-51.603	0.786573	many	1	many	4	15	16	6.634	0	0
11	-51.603	0.786573	many	1	many	4	16	16	5.51123	0	0
12	-51.6063	0.830904	many	1	many	1	7	7	6.72474	1	0
12	-51.6063	0.830904	many	1	many	1	8	7	34.5893	0	0
12	-51.6063	0.830904	many	1	many	1	9	10	20.3057	0	0
12	-51.6063	0.830904	many	1	many	1	10	10	8.07816	0	0
12	-51.6063	0.830904	many	1	many	1	11	10	5.76429	0	0
12	-51.6063	0.830904	many	1	many	1	12	13	7.04818	0	0
12	-51.6063	0.830904	many	1	many	1	13	13	5.80731	0	0
12	-51.6063	0.830904	many	1	many	1	14	13	9.61743	0	0
12	-51.6063	0.830904	many	1	many	1	15	16	4.17918	0	0
12	-51.6063	0.830904	many	1	many	1	16	16	1.89576	0	0
12	-51.6063	0.830904	many	1	many	1	17	16	7.36968	0	0
12	-51.6063	0.830904	many	1	many	2	8	7	9.79344	0	0
12	-51.6063	0.830904	many	1	many	2	9	10	23.9197	0	0
12	-51.6063	0.830904	many	1	many	2	10	10	4.95948	0	0
12	-51.6063	0.830904	many	1	many	2	11	10	2.83542	0	0
12	-51.6063	0.830904	many	1	many	2	12	13	2.12335	0	0
12	-51.6063	0.830904	many	1	many	2	13	13	0.115	0	0
12	-51.6063	0.830904	many	1	many	2	14	13	5.007	0	0
12	-51.6063	0.830904	many	1	many	2	17	16	8.96318	0	0
12	-51.6063	0.830904	many	1	many	3	8	7	26.2825	0	0
12	-51.6063	0.830904	many	1	many	3	9	10	22.2695	0	0
12	-51.6063	0.830904	many	1	many	3	10	10	8.50834	0	0
12	-51.6063	0.830904	many	1	many	3	11	10	3.38637	0	0
12	-51.6063	0.830904	many	1	many	3	12	13	1.59265	0	0
12	-51.6063	0.830904	many	1	many	3	13	13	8.90236	0	0
12	-51.6063	0.830904	many	1	many	3	14	13	7.57836	0	0
12	-51.6063	0.830904	many	1	many	3	15	16	20.731	0	0
12	-51.6063	0.830904	many	1	many	3	16	16	10.2662	0	0
12	-51.6063	0.830904	many	1	many	3	17	16	1.49157	0	1
12	-51.6063	0.830904	many	1	many	4	7	7	3.22778	0	0
12	-51.6063	0.830904	many	1	many	4	8	7	10.9381	0	0
12	-51.6063	0.830904	many	1	many	4	9	10	36.0072	0	0
12	-51.6063	0.830904	many	1	many	4	10	10	7.55377	0	0
12	-51.6063	0.830904	many	1	many	4	11	10	1.491	0	0
12	-51.6063	0.830904	many	1	many	4	13	13	9.846	0	0
12	-51.6063	0.830904	many	1	many	4	14	13	4.709	0	0
12	-51.6063	0.830904	many	1	many	4	15	16	8.485	0	0
12	-51.6063	0.830904	many	1	many	4	16	16	2.57094	0	0
12	-51.6063	0.830904	many	1	many	4	17	16	2.15651	0	0
13	-51.6268	0.869834	intermediate	1	intermediate with nets	1	7	7	12.2219	0	0
13	-51.6268	0.869834	intermediate	1	intermediate with nets	1	8	7	51.3399	0	0
13	-51.6268	0.869834	intermediate	1	intermediate with nets	1	9	10	11.0648	0	0
13	-51.6268	0.869834	intermediate	1	intermediate with nets	1	10	10	3.27727	0	0
13	-51.6268	0.869834	intermediate	1	intermediate with nets	1	11	10	5.38905	0	0
13	-51.6268	0.869834	intermediate	1	intermediate with nets	1	12	13	1.66294	0	0
13	-51.6268	0.869834	intermediate	1	intermediate with nets	1	13	13	4.38745	1	0
13	-51.6268	0.869834	intermediate	1	intermediate with nets	1	14	13	15.6356	0	0
13	-51.6268	0.869834	intermediate	1	intermediate with nets	1	15	16	3.75641	0	0
13	-51.6268	0.869834	intermediate	1	intermediate with nets	1	16	16	10.8436	0	0
13	-51.6268	0.869834	intermediate	1	intermediate with nets	1	17	16	1.56613	0	0
13	-51.6268	0.869834	intermediate	1	intermediate with nets	2	7	7	0.826004	0	0
13	-51.6268	0.869834	intermediate	1	intermediate with nets	2	8	7	24.6025	0	0
13	-51.6268	0.869834	intermediate	1	intermediate with nets	2	9	10	14.9177	0	0
13	-51.6268	0.869834	intermediate	1	intermediate with nets	2	12	13	1.33319	0	0
13	-51.6268	0.869834	intermediate	1	intermediate with nets	2	13	13	3.84035	0	0
13	-51.6268	0.869834	intermediate	1	intermediate with nets	2	14	13	6.22028	0	0
13	-51.6268	0.869834	intermediate	1	intermediate with nets	2	16	16	0.744647	0	0
13	-51.6268	0.869834	intermediate	1	intermediate with nets	2	17	16	4.87491	0	0
13	-51.6268	0.869834	intermediate	1	intermediate with nets	3	7	7	2.639	0	0
13	-51.6268	0.869834	intermediate	1	intermediate with nets	3	8	7	38.0565	0	0
13	-51.6268	0.869834	intermediate	1	intermediate with nets	3	9	10	12.7481	0	0
13	-51.6268	0.869834	intermediate	1	intermediate with nets	3	10	10	9.34491	0	0
13	-51.6268	0.869834	intermediate	1	intermediate with nets	3	11	10	4.28122	0	0
13	-51.6268	0.869834	intermediate	1	intermediate with nets	3	12	13	5.22807	0	0
13	-51.6268	0.869834	intermediate	1	intermediate with nets	3	13	13	8.94458	0	0
13	-51.6268	0.869834	intermediate	1	intermediate with nets	3	14	13	5.85718	0	0
13	-51.6268	0.869834	intermediate	1	intermediate with nets	3	15	16	14.1074	0	0
13	-51.6268	0.869834	intermediate	1	intermediate with nets	3	16	16	17.5504	0	0
13	-51.6268	0.869834	intermediate	1	intermediate with nets	3	17	16	5.51827	0	0
13	-51.6268	0.869834	intermediate	1	intermediate with nets	4	8	7	43.5182	0	0
13	-51.6268	0.869834	intermediate	1	intermediate with nets	4	9	10	19.1744	0	0
13	-51.6268	0.869834	intermediate	1	intermediate with nets	4	10	10	3.56944	0	0
13	-51.6268	0.869834	intermediate	1	intermediate with nets	4	13	13	0.257	0	0
13	-51.6268	0.869834	intermediate	1	intermediate with nets	4	14	13	10.718	0	0
13	-51.6268	0.869834	intermediate	1	intermediate with nets	4	15	16	3.629	0	0
13	-51.6268	0.869834	intermediate	1	intermediate with nets	4	16	16	8.26279	0	0
13	-51.6268	0.869834	intermediate	1	intermediate with nets	4	17	16	5.59966	0	0
14	-51.6035	0.904004	many	1	many	1	7	7	41.5819	0	1
14	-51.6035	0.904004	many	1	many	1	8	7	27.4971	0	0
14	-51.6035	0.904004	many	1	many	1	9	10	12.5154	0	0
14	-51.6035	0.904004	many	1	many	1	10	10	3.53463	0	0
14	-51.6035	0.904004	many	1	many	1	11	10	2.25937	0	0
14	-51.6035	0.904004	many	1	many	1	14	13	3.69701	0	0
14	-51.6035	0.904004	many	1	many	1	15	16	18.7492	0	0
14	-51.6035	0.904004	many	1	many	1	16	16	11.014	0	0
14	-51.6035	0.904004	many	1	many	1	17	16	15.3066	0	1
14	-51.6035	0.904004	many	1	many	2	7	7	12.4116	0	0
14	-51.6035	0.904004	many	1	many	2	8	7	24.9225	0	0
14	-51.6035	0.904004	many	1	many	2	9	10	5.91506	0	0
14	-51.6035	0.904004	many	1	many	2	14	13	4.49062	0	0
14	-51.6035	0.904004	many	1	many	2	15	16	7.49322	0	1
14	-51.6035	0.904004	many	1	many	2	16	16	1.28609	0	0
14	-51.6035	0.904004	many	1	many	3	7	7	29.1442	0	0
14	-51.6035	0.904004	many	1	many	3	8	7	18.4666	0	0
14	-51.6035	0.904004	many	1	many	3	9	10	6.78337	0	0
14	-51.6035	0.904004	many	1	many	3	10	10	10.0747	0	0
14	-51.6035	0.904004	many	1	many	3	11	10	6.33483	0	1
14	-51.6035	0.904004	many	1	many	3	13	13	7.25181	0	0
14	-51.6035	0.904004	many	1	many	3	14	13	8.662	0	0
14	-51.6035	0.904004	many	1	many	3	15	16	5.988	0	0
14	-51.6035	0.904004	many	1	many	3	16	16	7.06788	0	0
14	-51.6035	0.904004	many	1	many	3	17	16	12.3336	0	0
14	-51.6035	0.904004	many	1	many	4	7	7	14.7533	0	0
14	-51.6035	0.904004	many	1	many	4	8	7	40.2122	0	0
14	-51.6035	0.904004	many	1	many	4	9	10	10.3027	0	0
14	-51.6035	0.904004	many	1	many	4	10	10	5.74399	0	0
14	-51.6035	0.904004	many	1	many	4	14	13	5.479	0	0
14	-51.6035	0.904004	many	1	many	4	15	16	2.69951	0	0
14	-51.6035	0.904004	many	1	many	4	16	16	8.85618	0	0
14	-51.6035	0.904004	many	1	many	4	17	16	2.14772	0	0
15	-51.6168	0.935835	intermediate	1	intermediate with nets	1	6	7	0.956	0	0
15	-51.6168	0.935835	intermediate	1	intermediate with nets	1	7	7	44.9394	0	0
15	-51.6168	0.935835	intermediate	1	intermediate with nets	1	8	7	36.9251	0	0
15	-51.6168	0.935835	intermediate	1	intermediate with nets	1	9	10	7.42612	0	0
15	-51.6168	0.935835	intermediate	1	intermediate with nets	1	10	10	6.69231	0	0
15	-51.6168	0.935835	intermediate	1	intermediate with nets	1	11	10	1.29871	0	0
15	-51.6168	0.935835	intermediate	1	intermediate with nets	1	12	13	15.9583	0	0
15	-51.6168	0.935835	intermediate	1	intermediate with nets	1	13	13	15.1993	0	0
15	-51.6168	0.935835	intermediate	1	intermediate with nets	1	14	13	4.78927	0	0
15	-51.6168	0.935835	intermediate	1	intermediate with nets	1	15	16	4.2148	0	0
15	-51.6168	0.935835	intermediate	1	intermediate with nets	1	16	16	18.9192	0	1
15	-51.6168	0.935835	intermediate	1	intermediate with nets	1	17	16	14.0078	0	0
15	-51.6168	0.935835	intermediate	1	intermediate with nets	2	7	7	26.7387	0	0
15	-51.6168	0.935835	intermediate	1	intermediate with nets	2	8	7	39.8626	0	0
15	-51.6168	0.935835	intermediate	1	intermediate with nets	2	9	10	13.8022	0	0
15	-51.6168	0.935835	intermediate	1	intermediate with nets	2	10	10	8.46131	0	0
15	-51.6168	0.935835	intermediate	1	intermediate with nets	2	15	16	4.00791	0	0
15	-51.6168	0.935835	intermediate	1	intermediate with nets	2	16	16	6.82195	0	0
15	-51.6168	0.935835	intermediate	1	intermediate with nets	2	17	16	0.659528	0	0
15	-51.6168	0.935835	intermediate	1	intermediate with nets	3	7	7	45.7633	0	0
15	-51.6168	0.935835	intermediate	1	intermediate with nets	3	8	7	29.2234	0	0
15	-51.6168	0.935835	intermediate	1	intermediate with nets	3	9	10	4.60983	0	0
15	-51.6168	0.935835	intermediate	1	intermediate with nets	3	11	10	0.391729	0	0
15	-51.6168	0.935835	intermediate	1	intermediate with nets	3	12	13	3.40652	0	0
15	-51.6168	0.935835	intermediate	1	intermediate with nets	3	13	13	1.98731	0	0
15	-51.6168	0.935835	intermediate	1	intermediate with nets	3	15	16	0.077	0	0
15	-51.6168	0.935835	intermediate	1	intermediate with nets	3	16	16	8.692	0	0
15	-51.6168	0.935835	intermediate	1	intermediate with nets	3	17	16	1.665	0	0
15	-51.6168	0.935835	intermediate	1	intermediate with nets	4	7	7	33.2584	0	0
15	-51.6168	0.935835	intermediate	1	intermediate with nets	4	8	7	28.6755	0	0
15	-51.6168	0.935835	intermediate	1	intermediate with nets	4	10	10	5.38566	0	1
15	-51.6168	0.935835	intermediate	1	intermediate with nets	4	11	10	5.41389	0	0
15	-51.6168	0.935835	intermediate	1	intermediate with nets	4	12	13	0.062	0	0
15	-51.6168	0.935835	intermediate	1	intermediate with nets	4	14	13	1.526	0	0
15	-51.6168	0.935835	intermediate	1	intermediate with nets	4	17	16	0.231	0	0
16	-51.6535	0.959856	intermediate	1	intermediate with nets	1	7	7	10.3951	0	0
16	-51.6535	0.959856	intermediate	1	intermediate with nets	1	8	7	47.9069	0	0
16	-51.6535	0.959856	intermediate	1	intermediate with nets	1	9	10	33.8285	0	0
16	-51.6535	0.959856	intermediate	1	intermediate with nets	1	10	10	8.49614	0	0
16	-51.6535	0.959856	intermediate	1	intermediate with nets	1	11	10	14.8773	0	0
16	-51.6535	0.959856	intermediate	1	intermediate with nets	1	12	13	11.9989	0	0
16	-51.6535	0.959856	intermediate	1	intermediate with nets	1	13	13	6.86735	0	0
16	-51.6535	0.959856	intermediate	1	intermediate with nets	1	14	13	14.5345	0	0
16	-51.6535	0.959856	intermediate	1	intermediate with nets	1	15	16	13.1548	0	0
16	-51.6535	0.959856	intermediate	1	intermediate with nets	1	16	16	14.5239	0	0
16	-51.6535	0.959856	intermediate	1	intermediate with nets	1	17	16	16.5656	0	0
16	-51.6535	0.959856	intermediate	1	intermediate with nets	2	7	7	3.68511	0	0
16	-51.6535	0.959856	intermediate	1	intermediate with nets	2	8	7	36.1784	0	1
16	-51.6535	0.959856	intermediate	1	intermediate with nets	2	9	10	24.4209	0	1
16	-51.6535	0.959856	intermediate	1	intermediate with nets	2	10	10	6.09178	0	0
16	-51.6535	0.959856	intermediate	1	intermediate with nets	2	11	10	5.98545	0	0
16	-51.6535	0.959856	intermediate	1	intermediate with nets	2	12	13	0.105334	0	0
16	-51.6535	0.959856	intermediate	1	intermediate with nets	2	13	13	2.53467	0	0
16	-51.6535	0.959856	intermediate	1	intermediate with nets	2	14	13	2.78695	0	0
16	-51.6535	0.959856	intermediate	1	intermediate with nets	2	15	16	5.37703	0	0
16	-51.6535	0.959856	intermediate	1	intermediate with nets	2	16	16	5.60102	0	0
16	-51.6535	0.959856	intermediate	1	intermediate with nets	3	7	7	12.7197	0	0
16	-51.6535	0.959856	intermediate	1	intermediate with nets	3	8	7	61.1585	0	1
16	-51.6535	0.959856	intermediate	1	intermediate with nets	3	9	10	6.98633	0	0
16	-51.6535	0.959856	intermediate	1	intermediate with nets	3	11	10	1.37312	0	0
16	-51.6535	0.959856	intermediate	1	intermediate with nets	3	12	13	3.77423	0	0
16	-51.6535	0.959856	intermediate	1	intermediate with nets	3	15	16	0.951	0	0
16	-51.6535	0.959856	intermediate	1	intermediate with nets	3	16	16	11.505	0	0
16	-51.6535	0.959856	intermediate	1	intermediate with nets	4	7	7	15.068	0	0
16	-51.6535	0.959856	intermediate	1	intermediate with nets	4	8	7	41.6712	0	0
16	-51.6535	0.959856	intermediate	1	intermediate with nets	4	9	10	6.77576	0	0
16	-51.6535	0.959856	intermediate	1	intermediate with nets	4	10	10	2.69145	0	0
16	-51.6535	0.959856	intermediate	1	intermediate with nets	4	11	10	6.06865	0	0
16	-51.6535	0.959856	intermediate	1	intermediate with nets	4	12	13	2.27471	0	0
16	-51.6535	0.959856	intermediate	1	intermediate with nets	4	13	13	1.07729	0	0
16	-51.6535	0.959856	intermediate	1	intermediate with nets	4	14	13	3.944	0	0
16	-51.6535	0.959856	intermediate	1	intermediate with nets	4	15	16	0.355	0	0
16	-51.6535	0.959856	intermediate	1	intermediate with nets	4	16	16	2.28612	0	1
16	-51.6535	0.959856	intermediate	1	intermediate with nets	4	17	16	0.126	0	0
17	-51.6678	0.989939	intermediate	1	intermediate with nets	1	8	7	28.687	0	0
17	-51.6678	0.989939	intermediate	1	intermediate with nets	1	9	10	37.3617	0	0
17	-51.6678	0.989939	intermediate	1	intermediate with nets	1	10	10	7.0186	0	0
17	-51.6678	0.989939	intermediate	1	intermediate with nets	1	11	10	31.2413	0	0
17	-51.6678	0.989939	intermediate	1	intermediate with nets	1	12	13	9.90777	0	0
17	-51.6678	0.989939	intermediate	1	intermediate with nets	1	13	13	11.1878	0	0
17	-51.6678	0.989939	intermediate	1	intermediate with nets	1	14	13	3.69216	0	0
17	-51.6678	0.989939	intermediate	1	intermediate with nets	1	15	16	14.9214	0	0
17	-51.6678	0.989939	intermediate	1	intermediate with nets	1	16	16	5.63698	0	0
17	-51.6678	0.989939	intermediate	1	intermediate with nets	1	17	16	8.19553	0	0
17	-51.6678	0.989939	intermediate	1	intermediate with nets	2	7	7	1.365	0	0
17	-51.6678	0.989939	intermediate	1	intermediate with nets	2	8	7	11.1078	0	0
17	-51.6678	0.989939	intermediate	1	intermediate with nets	2	9	10	32.6609	0	0
17	-51.6678	0.989939	intermediate	1	intermediate with nets	2	10	10	10.1982	0	0
17	-51.6678	0.989939	intermediate	1	intermediate with nets	2	11	10	5.22576	0	0
17	-51.6678	0.989939	intermediate	1	intermediate with nets	2	12	13	0.20811	0	0
17	-51.6678	0.989939	intermediate	1	intermediate with nets	2	13	13	1.13659	0	0
17	-51.6678	0.989939	intermediate	1	intermediate with nets	2	14	13	11.6901	0	0
17	-51.6678	0.989939	intermediate	1	intermediate with nets	2	15	16	3.98023	0	0
17	-51.6678	0.989939	intermediate	1	intermediate with nets	2	16	16	1.32038	0	0
17	-51.6678	0.989939	intermediate	1	intermediate with nets	3	7	7	3.53123	0	0
17	-51.6678	0.989939	intermediate	1	intermediate with nets	3	8	7	35.7724	0	0
17	-51.6678	0.989939	intermediate	1	intermediate with nets	3	9	10	40.6828	0	1
17	-51.6678	0.989939	intermediate	1	intermediate with nets	3	10	10	0.571259	1	0
17	-51.6678	0.989939	intermediate	1	intermediate with nets	3	11	10	5.86299	0	0
17	-51.6678	0.989939	intermediate	1	intermediate with nets	3	14	13	0.225	0	0
17	-51.6678	0.989939	intermediate	1	intermediate with nets	3	15	16	10.392	0	0
17	-51.6678	0.989939	intermediate	1	intermediate with nets	3	16	16	2.33	0	0
17	-51.6678	0.989939	intermediate	1	intermediate with nets	4	8	7	21.9374	0	0
17	-51.6678	0.989939	intermediate	1	intermediate with nets	4	9	10	29.8865	0	0
17	-51.6678	0.989939	intermediate	1	intermediate with nets	4	10	10	3.19673	0	0
17	-51.6678	0.989939	intermediate	1	intermediate with nets	4	11	10	6.3677	0	0
17	-51.6678	0.989939	intermediate	1	intermediate with nets	4	13	13	8.24811	0	0
17	-51.6678	0.989939	intermediate	1	intermediate with nets	4	14	13	2.17816	0	0
17	-51.6678	0.989939	intermediate	1	intermediate with nets	4	15	16	2.269	0	1
17	-51.6678	0.989939	intermediate	1	intermediate with nets	4	16	16	0.718	0	0
18	-51.6899	0.999631	intermediate	1	intermediate with nets	1	7	7	2.20172	0	0
18	-51.6899	0.999631	intermediate	1	intermediate with nets	1	8	7	19.111	0	0
18	-51.6899	0.999631	intermediate	1	intermediate with nets	1	9	10	47.6478	0	0
18	-51.6899	0.999631	intermediate	1	intermediate with nets	1	10	10	49.4635	0	0
18	-51.6899	0.999631	intermediate	1	intermediate with nets	1	11	10	18.5116	0	0
18	-51.6899	0.999631	intermediate	1	intermediate with nets	1	12	13	2.567	0	0
18	-51.6899	0.999631	intermediate	1	intermediate with nets	1	13	13	6.31964	0	0
18	-51.6899	0.999631	intermediate	1	intermediate with nets	1	14	13	24.1387	0	0
18	-51.6899	0.999631	intermediate	1	intermediate with nets	1	15	16	15.442	0	0
18	-51.6899	0.999631	intermediate	1	intermediate with nets	1	16	16	14.9594	0	0
18	-51.6899	0.999631	intermediate	1	intermediate with nets	1	17	16	1.485	0	0
18	-51.6899	0.999631	intermediate	1	intermediate with nets	2	8	7	4.387	0	0
18	-51.6899	0.999631	intermediate	1	intermediate with nets	2	9	10	22.6815	0	0
18	-51.6899	0.999631	intermediate	1	intermediate with nets	2	10	10	37.1249	0	0
18	-51.6899	0.999631	intermediate	1	intermediate with nets	2	11	10	8.57103	0	0
18	-51.6899	0.999631	intermediate	1	intermediate with nets	2	12	13	7.63314	0	0
18	-51.6899	0.999631	intermediate	1	intermediate with nets	2	13	13	4.43587	0	0
18	-51.6899	0.999631	intermediate	1	intermediate with nets	2	14	13	3.79115	0	0
18	-51.6899	0.999631	intermediate	1	intermediate with nets	2	15	16	9.98592	0	0
18	-51.6899	0.999631	intermediate	1	intermediate with nets	3	7	7	10.3737	0	0
18	-51.6899	0.999631	intermediate	1	intermediate with nets	3	8	7	18.1576	0	0
18	-51.6899	0.999631	intermediate	1	intermediate with nets	3	9	10	45.4097	0	0
18	-51.6899	0.999631	intermediate	1	intermediate with nets	3	10	10	30.5556	0	0
18	-51.6899	0.999631	intermediate	1	intermediate with nets	3	11	10	3.58625	0	0
18	-51.6899	0.999631	intermediate	1	intermediate with nets	3	12	13	7.398	0	0
18	-51.6899	0.999631	intermediate	1	intermediate with nets	3	13	13	4.501	0	0
18	-51.6899	0.999631	intermediate	1	intermediate with nets	3	14	13	1.134	0	0
18	-51.6899	0.999631	intermediate	1	intermediate with nets	3	15	16	14.968	0	0
18	-51.6899	0.999631	intermediate	1	intermediate with nets	3	16	16	4.419	0	0
18	-51.6899	0.999631	intermediate	1	intermediate with nets	3	17	16	1.227	0	0
18	-51.6899	0.999631	intermediate	1	intermediate with nets	4	8	7	14.469	0	0
18	-51.6899	0.999631	intermediate	1	intermediate with nets	4	9	10	27.0051	0	0
18	-51.6899	0.999631	intermediate	1	intermediate with nets	4	10	10	27.3958	0	0
18	-51.6899	0.999631	intermediate	1	intermediate with nets	4	11	10	4.63112	0	0
18	-51.6899	0.999631	intermediate	1	intermediate with nets	4	12	13	5.716	0	0
18	-51.6899	0.999631	intermediate	1	intermediate with nets	4	13	13	14.787	0	0
18	-51.6899	0.999631	intermediate	1	intermediate with nets	4	14	13	1.12193	0	0
18	-51.6899	0.999631	intermediate	1	intermediate with nets	4	15	16	8.65283	0	0
18	-51.6899	0.999631	intermediate	1	intermediate with nets	4	16	16	4.862	0	0
19	-51.7077	0.989805	intermediate	1	intermediate with nets	1	7	7	4.94454	0	0
19	-51.7077	0.989805	intermediate	1	intermediate with nets	1	8	7	5.52346	0	0
19	-51.7077	0.989805	intermediate	1	intermediate with nets	1	9	10	24.104	0	0
19	-51.7077	0.989805	intermediate	1	intermediate with nets	1	10	10	65.248	0	1
19	-51.7077	0.989805	intermediate	1	intermediate with nets	1	11	10	21.4874	0	0
19	-51.7077	0.989805	intermediate	1	intermediate with nets	1	12	13	1.73497	0	0
19	-51.7077	0.989805	intermediate	1	intermediate with nets	1	13	13	12.0895	0	0
19	-51.7077	0.989805	intermediate	1	intermediate with nets	1	14	13	8.88535	1	0
19	-51.7077	0.989805	intermediate	1	intermediate with nets	1	15	16	14.7889	0	0
19	-51.7077	0.989805	intermediate	1	intermediate with nets	1	16	16	15.5029	0	0
19	-51.7077	0.989805	intermediate	1	intermediate with nets	1	17	16	1.10183	0	0
19	-51.7077	0.989805	intermediate	1	intermediate with nets	2	7	7	4.51372	0	0
19	-51.7077	0.989805	intermediate	1	intermediate with nets	2	8	7	0.388457	0	0
19	-51.7077	0.989805	intermediate	1	intermediate with nets	2	9	10	6.73957	0	0
19	-51.7077	0.989805	intermediate	1	intermediate with nets	2	10	10	26.2867	0	0
19	-51.7077	0.989805	intermediate	1	intermediate with nets	2	11	10	31.8393	0	1
19	-51.7077	0.989805	intermediate	1	intermediate with nets	2	12	13	3.30892	0	0
19	-51.7077	0.989805	intermediate	1	intermediate with nets	2	13	13	13.2291	0	0
19	-51.7077	0.989805	intermediate	1	intermediate with nets	2	14	13	5.2777	0	0
19	-51.7077	0.989805	intermediate	1	intermediate with nets	2	15	16	0.640041	0	0
19	-51.7077	0.989805	intermediate	1	intermediate with nets	3	7	7	0.279923	0	0
19	-51.7077	0.989805	intermediate	1	intermediate with nets	3	8	7	16.9886	0	0
19	-51.7077	0.989805	intermediate	1	intermediate with nets	3	9	10	16.1916	0	0
19	-51.7077	0.989805	intermediate	1	intermediate with nets	3	10	10	39.4388	0	0
19	-51.7077	0.989805	intermediate	1	intermediate with nets	3	11	10	3.59968	0	0
19	-51.7077	0.989805	intermediate	1	intermediate with nets	3	12	13	0.551973	0	0
19	-51.7077	0.989805	intermediate	1	intermediate with nets	3	13	13	7.73003	0	0
19	-51.7077	0.989805	intermediate	1	intermediate with nets	3	14	13	7.123	0	0
19	-51.7077	0.989805	intermediate	1	intermediate with nets	3	15	16	12.778	0	0
19	-51.7077	0.989805	intermediate	1	intermediate with nets	4	8	7	2.552	0	0
19	-51.7077	0.989805	intermediate	1	intermediate with nets	4	9	10	14.312	0	0
19	-51.7077	0.989805	intermediate	1	intermediate with nets	4	10	10	17.5627	1	1
19	-51.7077	0.989805	intermediate	1	intermediate with nets	4	11	10	10.625	0	0
19	-51.7077	0.989805	intermediate	1	intermediate with nets	4	12	13	1.57678	0	0
19	-51.7077	0.989805	intermediate	1	intermediate with nets	4	13	13	8.247	0	0
19	-51.7077	0.989805	intermediate	1	intermediate with nets	4	14	13	8.39	0	0
19	-51.7077	0.989805	intermediate	1	intermediate with nets	4	15	16	1.837	0	0
20	-51.7476	0.977567	intermediate	1	intermediate with nets	1	8	7	4.55091	0	0
20	-51.7476	0.977567	intermediate	1	intermediate with nets	1	9	10	29.0913	0	1
20	-51.7476	0.977567	intermediate	1	intermediate with nets	1	10	10	28.6232	0	0
20	-51.7476	0.977567	intermediate	1	intermediate with nets	1	11	10	49.2558	0	0
20	-51.7476	0.977567	intermediate	1	intermediate with nets	1	12	13	12.3925	0	0
20	-51.7476	0.977567	intermediate	1	intermediate with nets	1	13	13	10.7313	0	0
20	-51.7476	0.977567	intermediate	1	intermediate with nets	1	14	13	12.402	0	0
20	-51.7476	0.977567	intermediate	1	intermediate with nets	1	15	16	9.716	0	0
20	-51.7476	0.977567	intermediate	1	intermediate with nets	1	16	16	2.362	0	0
20	-51.7476	0.977567	intermediate	1	intermediate with nets	2	8	7	3.36338	0	0
20	-51.7476	0.977567	intermediate	1	intermediate with nets	2	9	10	4.14615	0	1
20	-51.7476	0.977567	intermediate	1	intermediate with nets	2	10	10	17.5058	0	0
20	-51.7476	0.977567	intermediate	1	intermediate with nets	2	11	10	23.6092	0	0
20	-51.7476	0.977567	intermediate	1	intermediate with nets	2	12	13	9.57476	0	0
20	-51.7476	0.977567	intermediate	1	intermediate with nets	2	13	13	14.9009	0	1
20	-51.7476	0.977567	intermediate	1	intermediate with nets	2	14	13	13.7093	0	0
20	-51.7476	0.977567	intermediate	1	intermediate with nets	3	8	7	2.47725	0	0
20	-51.7476	0.977567	intermediate	1	intermediate with nets	3	9	10	18.0562	0	0
20	-51.7476	0.977567	intermediate	1	intermediate with nets	3	10	10	27.7995	0	0
20	-51.7476	0.977567	intermediate	1	intermediate with nets	3	11	10	18.3738	0	0
20	-51.7476	0.977567	intermediate	1	intermediate with nets	3	12	13	7.56898	0	1
20	-51.7476	0.977567	intermediate	1	intermediate with nets	3	13	13	4.1427	0	0
20	-51.7476	0.977567	intermediate	1	intermediate with nets	3	14	13	20.4746	0	1
20	-51.7476	0.977567	intermediate	1	intermediate with nets	3	15	16	10.5092	0	0
20	-51.7476	0.977567	intermediate	1	intermediate with nets	3	16	16	2.54885	0	0
20	-51.7476	0.977567	intermediate	1	intermediate with nets	4	9	10	7.257	0	0
20	-51.7476	0.977567	intermediate	1	intermediate with nets	4	10	10	7.457	0	0
20	-51.7476	0.977567	intermediate	1	intermediate with nets	4	11	10	16.1366	0	0
20	-51.7476	0.977567	intermediate	1	intermediate with nets	4	12	13	5.5866	0	0
20	-51.7476	0.977567	intermediate	1	intermediate with nets	4	13	13	12.9775	0	0
20	-51.7476	0.977567	intermediate	1	intermediate with nets	4	14	13	7.643	0	0
21	-51.7688	0.990053	intermediate	1	intermediate with nets	1	8	7	9.78308	0	0
21	-51.7688	0.990053	intermediate	1	intermediate with nets	1	9	10	14.296	0	0
21	-51.7688	0.990053	intermediate	1	intermediate with nets	1	10	10	21.287	0	0
21	-51.7688	0.990053	intermediate	1	intermediate with nets	1	11	10	27.4945	0	0
21	-51.7688	0.990053	intermediate	1	intermediate with nets	1	12	13	22.6913	0	0
21	-51.7688	0.990053	intermediate	1	intermediate with nets	1	13	13	27.4274	1	0
21	-51.7688	0.990053	intermediate	1	intermediate with nets	1	14	13	12.679	0	0
21	-51.7688	0.990053	intermediate	1	intermediate with nets	1	15	16	5.45834	0	0
21	-51.7688	0.990053	intermediate	1	intermediate with nets	1	16	16	0.129706	0	0
21	-51.7688	0.990053	intermediate	1	intermediate with nets	2	9	10	8.55999	0	0
21	-51.7688	0.990053	intermediate	1	intermediate with nets	2	10	10	2.30367	0	0
21	-51.7688	0.990053	intermediate	1	intermediate with nets	2	11	10	20.7117	0	0
21	-51.7688	0.990053	intermediate	1	intermediate with nets	2	12	13	14.6459	0	0
21	-51.7688	0.990053	intermediate	1	intermediate with nets	2	13	13	9.66324	1	0
21	-51.7688	0.990053	intermediate	1	intermediate with nets	2	14	13	8.00663	0	0
21	-51.7688	0.990053	intermediate	1	intermediate with nets	2	15	16	6.09547	1	0
21	-51.7688	0.990053	intermediate	1	intermediate with nets	2	16	16	0.105708	0	0
21	-51.7688	0.990053	intermediate	1	intermediate with nets	3	9	10	4.88833	0	0
21	-51.7688	0.990053	intermediate	1	intermediate with nets	3	10	10	14.6456	0	0
21	-51.7688	0.990053	intermediate	1	intermediate with nets	3	11	10	25.807	1	0
21	-51.7688	0.990053	intermediate	1	intermediate with nets	3	12	13	12.0665	0	0
21	-51.7688	0.990053	intermediate	1	intermediate with nets	3	13	13	18.9498	0	0
21	-51.7688	0.990053	intermediate	1	intermediate with nets	3	14	13	19.8723	1	0
21	-51.7688	0.990053	intermediate	1	intermediate with nets	3	15	16	4.85008	0	0
21	-51.7688	0.990053	intermediate	1	intermediate with nets	4	9	10	8.054	0	0
21	-51.7688	0.990053	intermediate	1	intermediate with nets	4	10	10	7.336	0	0
21	-51.7688	0.990053	intermediate	1	intermediate with nets	4	11	10	5.49525	0	0
21	-51.7688	0.990053	intermediate	1	intermediate with nets	4	12	13	7.89335	0	0
21	-51.7688	0.990053	intermediate	1	intermediate with nets	4	13	13	13.9379	1	0
21	-51.7688	0.990053	intermediate	1	intermediate with nets	4	14	13	9.95848	0	0
22	-51.7983	0.98098	intermediate	1	intermediate with nets	1	7	7	2.9669	0	0
22	-51.7983	0.98098	intermediate	1	intermediate with nets	1	8	7	17.1633	1	0
22	-51.7983	0.98098	intermediate	1	intermediate with nets	1	9	10	10.8801	0	1
22	-51.7983	0.98098	intermediate	1	intermediate with nets	1	10	10	7.50879	0	0
22	-51.7983	0.98098	intermediate	1	intermediate with nets	1	11	10	15.785	0	0
22	-51.7983	0.98098	intermediate	1	intermediate with nets	1	12	13	14.3798	0	0
22	-51.7983	0.98098	intermediate	1	intermediate with nets	1	13	13	43.0256	0	1
22	-51.7983	0.98098	intermediate	1	intermediate with nets	1	14	13	10.7214	1	0
22	-51.7983	0.98098	intermediate	1	intermediate with nets	1	15	16	4.55433	0	0
22	-51.7983	0.98098	intermediate	1	intermediate with nets	1	16	16	6.26533	0	0
22	-51.7983	0.98098	intermediate	1	intermediate with nets	1	17	16	0.88004	0	0
22	-51.7983	0.98098	intermediate	1	intermediate with nets	2	9	10	5.27463	0	0
22	-51.7983	0.98098	intermediate	1	intermediate with nets	2	11	10	6.41329	0	0
22	-51.7983	0.98098	intermediate	1	intermediate with nets	2	12	13	15.8148	0	0
22	-51.7983	0.98098	intermediate	1	intermediate with nets	2	13	13	12.7786	1	0
22	-51.7983	0.98098	intermediate	1	intermediate with nets	2	14	13	4.18386	0	0
22	-51.7983	0.98098	intermediate	1	intermediate with nets	2	15	16	5.1221	0	0
22	-51.7983	0.98098	intermediate	1	intermediate with nets	2	16	16	5.35609	0	0
22	-51.7983	0.98098	intermediate	1	intermediate with nets	3	10	10	10.1182	0	0
22	-51.7983	0.98098	intermediate	1	intermediate with nets	3	11	10	15.362	0	0
22	-51.7983	0.98098	intermediate	1	intermediate with nets	3	12	13	15.2202	0	0
22	-51.7983	0.98098	intermediate	1	intermediate with nets	3	13	13	31.086	0	0
22	-51.7983	0.98098	intermediate	1	intermediate with nets	3	14	13	10.3588	0	0
22	-51.7983	0.98098	intermediate	1	intermediate with nets	4	9	10	2.54	0	0
22	-51.7983	0.98098	intermediate	1	intermediate with nets	4	10	10	11.62	0	0
22	-51.7983	0.98098	intermediate	1	intermediate with nets	4	11	10	5.321	0	0
22	-51.7983	0.98098	intermediate	1	intermediate with nets	4	12	13	2.211	0	0
22	-51.7983	0.98098	intermediate	1	intermediate with nets	4	13	13	16.6573	0	0
22	-51.7983	0.98098	intermediate	1	intermediate with nets	4	14	13	3.70034	0	0
22	-51.7983	0.98098	intermediate	1	intermediate with nets	4	15	16	5.09267	0	0
23	-51.8153	0.999363	intermediate	0	intermediate no nets	1	7	7	12.1907	0	0
23	-51.8153	0.999363	intermediate	0	intermediate no nets	1	8	7	11.7825	0	1
23	-51.8153	0.999363	intermediate	0	intermediate no nets	1	9	10	4.79404	1	0
23	-51.8153	0.999363	intermediate	0	intermediate no nets	1	10	10	8.87262	0	0
23	-51.8153	0.999363	intermediate	0	intermediate no nets	1	11	10	9.45615	1	0
23	-51.8153	0.999363	intermediate	0	intermediate no nets	1	12	13	8.53589	0	0
23	-51.8153	0.999363	intermediate	0	intermediate no nets	1	13	13	30.2396	0	0
23	-51.8153	0.999363	intermediate	0	intermediate no nets	1	14	13	25.4381	0	0
23	-51.8153	0.999363	intermediate	0	intermediate no nets	1	15	16	7.98166	0	0
23	-51.8153	0.999363	intermediate	0	intermediate no nets	1	16	16	4.32185	0	0
23	-51.8153	0.999363	intermediate	0	intermediate no nets	1	17	16	6.21902	0	0
23	-51.8153	0.999363	intermediate	0	intermediate no nets	2	7	7	0.0733374	0	0
23	-51.8153	0.999363	intermediate	0	intermediate no nets	2	8	7	3.30286	0	0
23	-51.8153	0.999363	intermediate	0	intermediate no nets	2	9	10	0.892519	0	0
23	-51.8153	0.999363	intermediate	0	intermediate no nets	2	12	13	4.72846	0	0
23	-51.8153	0.999363	intermediate	0	intermediate no nets	2	13	13	15.8901	0	0
23	-51.8153	0.999363	intermediate	0	intermediate no nets	2	14	13	7.1667	0	0
23	-51.8153	0.999363	intermediate	0	intermediate no nets	2	15	16	3.31299	0	0
23	-51.8153	0.999363	intermediate	0	intermediate no nets	2	16	16	2.23194	1	0
23	-51.8153	0.999363	intermediate	0	intermediate no nets	2	17	16	1.13707	0	0
23	-51.8153	0.999363	intermediate	0	intermediate no nets	3	8	7	0.929	0	0
23	-51.8153	0.999363	intermediate	0	intermediate no nets	3	9	10	1.488	1	0
23	-51.8153	0.999363	intermediate	0	intermediate no nets	3	10	10	6.123	0	0
23	-51.8153	0.999363	intermediate	0	intermediate no nets	3	11	10	5.94377	0	0
23	-51.8153	0.999363	intermediate	0	intermediate no nets	3	12	13	15.1005	0	0
23	-51.8153	0.999363	intermediate	0	intermediate no nets	3	13	13	25.3856	0	0
23	-51.8153	0.999363	intermediate	0	intermediate no nets	3	14	13	14.0572	0	0
23	-51.8153	0.999363	intermediate	0	intermediate no nets	4	7	7	0.864	0	0
23	-51.8153	0.999363	intermediate	0	intermediate no nets	4	8	7	0.482	0	0
23	-51.8153	0.999363	intermediate	0	intermediate no nets	4	10	10	6.535	0	0
23	-51.8153	0.999363	intermediate	0	intermediate no nets	4	11	10	4.251	0	0
23	-51.8153	0.999363	intermediate	0	intermediate no nets	4	12	13	2.427	0	0
23	-51.8153	0.999363	intermediate	0	intermediate no nets	4	13	13	5.505	0	0
23	-51.8153	0.999363	intermediate	0	intermediate no nets	4	14	13	10.2895	0	0
23	-51.8153	0.999363	intermediate	0	intermediate no nets	4	15	16	1.63855	0	0
23	-51.8153	0.999363	intermediate	0	intermediate no nets	4	16	16	2.47336	0	0
24	-51.8361	1.03401	few	0	few	1	9	10	8.653	0	0
24	-51.8361	1.03401	few	0	few	1	10	10	0.123	0	0
24	-51.8361	1.03401	few	0	few	1	11	10	8.89479	0	0
24	-51.8361	1.03401	few	0	few	1	12	13	0.464319	0	0
24	-51.8361	1.03401	few	0	few	1	13	13	5.3539	0	0
24	-51.8361	1.03401	few	0	few	1	14	13	9.8815	0	0
24	-51.8361	1.03401	few	0	few	1	15	16	11.7042	0	0
24	-51.8361	1.03401	few	0	few	1	16	16	4.493	0	0
24	-51.8361	1.03401	few	0	few	3	8	7	0.512	0	0
24	-51.8361	1.03401	few	0	few	3	9	10	8.825	0	0
24	-51.8361	1.03401	few	0	few	3	10	10	1.507	0	0
24	-51.8361	1.03401	few	0	few	3	11	10	3.946	0	0
24	-51.8361	1.03401	few	0	few	3	12	13	3.05829	0	0
24	-51.8361	1.03401	few	0	few	3	13	13	2.34917	0	0
24	-51.8361	1.03401	few	0	few	4	8	7	3.409	0	0
24	-51.8361	1.03401	few	0	few	4	9	10	4.458	0	0
24	-51.8361	1.03401	few	0	few	4	10	10	1.319	0	0
24	-51.8361	1.03401	few	0	few	4	11	10	2.661	0	0
24	-51.8361	1.03401	few	0	few	4	12	13	1.466	0	0
24	-51.8361	1.03401	few	0	few	4	13	13	2.502	0	0
24	-51.8361	1.03401	few	0	few	4	14	13	0.895079	0	0
24	-51.8361	1.03401	few	0	few	4	15	16	8.1478	0	0
24	-51.8361	1.03401	few	0	few	4	16	16	0.4	0	0
25	-51.867	1.03847	intermediate	1	intermediate with nets	1	7	7	4.11	0	0
25	-51.867	1.03847	intermediate	1	intermediate with nets	1	8	7	5.834	0	0
25	-51.867	1.03847	intermediate	1	intermediate with nets	1	9	10	1.304	0	0
25	-51.867	1.03847	intermediate	1	intermediate with nets	1	11	10	5.173	0	0
25	-51.867	1.03847	intermediate	1	intermediate with nets	1	12	13	2.79509	0	0
25	-51.867	1.03847	intermediate	1	intermediate with nets	1	13	13	7.81659	0	0
25	-51.867	1.03847	intermediate	1	intermediate with nets	1	14	13	3.7951	0	0
25	-51.867	1.03847	intermediate	1	intermediate with nets	1	15	16	25.2022	0	0
25	-51.867	1.03847	intermediate	1	intermediate with nets	1	16	16	1.89	0	0
25	-51.867	1.03847	intermediate	1	intermediate with nets	3	9	10	8.89	0	0
25	-51.867	1.03847	intermediate	1	intermediate with nets	3	10	10	1.536	0	0
25	-51.867	1.03847	intermediate	1	intermediate with nets	3	11	10	0.959	0	0
25	-51.867	1.03847	intermediate	1	intermediate with nets	3	13	13	5.49969	0	0
25	-51.867	1.03847	intermediate	1	intermediate with nets	4	8	7	4.736	0	0
25	-51.867	1.03847	intermediate	1	intermediate with nets	4	9	10	5.15	0	0
25	-51.867	1.03847	intermediate	1	intermediate with nets	4	11	10	3.68	0	0
25	-51.867	1.03847	intermediate	1	intermediate with nets	4	12	13	3.823	0	0
25	-51.867	1.03847	intermediate	1	intermediate with nets	4	15	16	4.994	0	0
26	-51.8909	1.05092	intermediate	0	intermediate no nets	1	6	7	0.838	0	0
26	-51.8909	1.05092	intermediate	0	intermediate no nets	1	7	7	3.42007	0	0
26	-51.8909	1.05092	intermediate	0	intermediate no nets	1	8	7	4.12	0	0
26	-51.8909	1.05092	intermediate	0	intermediate no nets	1	9	10	2.358	0	0
26	-51.8909	1.05092	intermediate	0	intermediate no nets	1	11	10	4.76859	0	0
26	-51.8909	1.05092	intermediate	0	intermediate no nets	1	12	13	5.34801	0	0
26	-51.8909	1.05092	intermediate	0	intermediate no nets	1	13	13	3.08651	0	0
26	-51.8909	1.05092	intermediate	0	intermediate no nets	1	14	13	13.6987	0	0
26	-51.8909	1.05092	intermediate	0	intermediate no nets	1	15	16	5.07837	0	0
26	-51.8909	1.05092	intermediate	0	intermediate no nets	1	16	16	1.53	0	0
26	-51.8909	1.05092	intermediate	0	intermediate no nets	1	17	16	1.477	1	0
26	-51.8909	1.05092	intermediate	0	intermediate no nets	3	10	10	10.801	0	0
26	-51.8909	1.05092	intermediate	0	intermediate no nets	3	13	13	1.06164	0	0
26	-51.8909	1.05092	intermediate	0	intermediate no nets	4	8	7	3.674	0	0
26	-51.8909	1.05092	intermediate	0	intermediate no nets	4	9	10	2.782	0	0
26	-51.8909	1.05092	intermediate	0	intermediate no nets	4	10	10	4.039	0	0
26	-51.8909	1.05092	intermediate	0	intermediate no nets	4	11	10	1.337	0	0
26	-51.8909	1.05092	intermediate	0	intermediate no nets	4	12	13	1.47	0	0
26	-51.8909	1.05092	intermediate	0	intermediate no nets	4	14	13	3.468	0	0
26	-51.8909	1.05092	intermediate	0	intermediate no nets	4	15	16	1.759	0	0
27	-51.9107	1.06916	few	0	few	1	7	7	7.44353	0	0
27	-51.9107	1.06916	few	0	few	1	8	7	2.35954	0	0
27	-51.9107	1.06916	few	0	few	1	9	10	5.713	0	0
27	-51.9107	1.06916	few	0	few	1	10	10	4.47104	0	0
27	-51.9107	1.06916	few	0	few	1	11	10	0.807015	0	0
27	-51.9107	1.06916	few	0	few	1	12	13	4.618	0	0
27	-51.9107	1.06916	few	0	few	1	13	13	4.83905	0	0
27	-51.9107	1.06916	few	0	few	1	14	13	12.9765	0	0
27	-51.9107	1.06916	few	0	few	1	16	16	1.858	0	0
27	-51.9107	1.06916	few	0	few	1	17	16	1.084	0	0
27	-51.9107	1.06916	few	0	few	3	10	10	5.875	0	0
27	-51.9107	1.06916	few	0	few	3	11	10	4.705	0	0
27	-51.9107	1.06916	few	0	few	4	9	10	5.342	0	0
27	-51.9107	1.06916	few	0	few	4	10	10	5.264	0	0
27	-51.9107	1.06916	few	0	few	4	14	13	5.567	0	0
28	-51.9301	1.0463	intermediate	0	intermediate no nets	1	7	7	3.55601	0	0
28	-51.9301	1.0463	intermediate	0	intermediate no nets	1	8	7	8.6544	0	0
28	-51.9301	1.0463	intermediate	0	intermediate no nets	1	9	10	2.17644	0	0
28	-51.9301	1.0463	intermediate	0	intermediate no nets	1	10	10	8.64364	0	0
28	-51.9301	1.0463	intermediate	0	intermediate no nets	1	12	13	3.169	0	0
28	-51.9301	1.0463	intermediate	0	intermediate no nets	1	13	13	11.8912	0	0
28	-51.9301	1.0463	intermediate	0	intermediate no nets	1	14	13	2.24901	0	0
28	-51.9301	1.0463	intermediate	0	intermediate no nets	1	15	16	0.885231	0	0
28	-51.9301	1.0463	intermediate	0	intermediate no nets	1	16	16	2.863	0	0
28	-51.9301	1.0463	intermediate	0	intermediate no nets	3	11	10	7.648	0	0
28	-51.9301	1.0463	intermediate	0	intermediate no nets	4	9	10	1.568	0	0
28	-51.9301	1.0463	intermediate	0	intermediate no nets	4	10	10	4.017	0	0
28	-51.9301	1.0463	intermediate	0	intermediate no nets	4	11	10	4.767	0	0
28	-51.9301	1.0463	intermediate	0	intermediate no nets	4	13	13	4.081	0	0
28	-51.9301	1.0463	intermediate	0	intermediate no nets	4	14	13	0.872	0	0
29	-51.9635	1.05663	intermediate	0	intermediate no nets	1	8	7	8.88238	0	0
29	-51.9635	1.05663	intermediate	0	intermediate no nets	1	9	10	10.6607	0	0
29	-51.9635	1.05663	intermediate	0	intermediate no nets	1	10	10	5.28	0	0
29	-51.9635	1.05663	intermediate	0	intermediate no nets	1	11	10	7.28	0	0
29	-51.9635	1.05663	intermediate	0	intermediate no nets	1	12	13	3.31249	0	0
29	-51.9635	1.05663	intermediate	0	intermediate no nets	1	13	13	4.72515	0	0
29	-51.9635	1.05663	intermediate	0	intermediate no nets	1	14	13	2.948	0	0
29	-51.9635	1.05663	intermediate	0	intermediate no nets	1	15	16	1.798	0	0
29	-51.9635	1.05663	intermediate	0	intermediate no nets	3	11	10	1.694	0	0
29	-51.9635	1.05663	intermediate	0	intermediate no nets	4	10	10	1.298	0	0
29	-51.9635	1.05663	intermediate	0	intermediate no nets	4	11	10	5.354	0	0
29	-51.9635	1.05663	intermediate	0	intermediate no nets	4	13	13	5.313	0	0
39	-51.5948	0.944275	intermediate	1	intermediate with nets	1	6	7	5.19609	0	0
39	-51.5948	0.944275	intermediate	1	intermediate with nets	1	7	7	62.0503	1	0
39	-51.5948	0.944275	intermediate	1	intermediate with nets	1	8	7	30.1354	0	0
39	-51.5948	0.944275	intermediate	1	intermediate with nets	1	9	10	30.3381	0	0
39	-51.5948	0.944275	intermediate	1	intermediate with nets	1	10	10	16.6546	0	0
39	-51.5948	0.944275	intermediate	1	intermediate with nets	1	11	10	13.543	0	0
39	-51.5948	0.944275	intermediate	1	intermediate with nets	1	12	13	5.75412	0	0
39	-51.5948	0.944275	intermediate	1	intermediate with nets	1	13	13	1.7943	0	1
39	-51.5948	0.944275	intermediate	1	intermediate with nets	1	14	13	11.3542	0	0
39	-51.5948	0.944275	intermediate	1	intermediate with nets	1	15	16	27.2425	1	0
39	-51.5948	0.944275	intermediate	1	intermediate with nets	1	16	16	16.4287	1	0
39	-51.5948	0.944275	intermediate	1	intermediate with nets	1	17	16	16.3835	0	0
39	-51.5948	0.944275	intermediate	1	intermediate with nets	2	7	7	5.65422	1	0
39	-51.5948	0.944275	intermediate	1	intermediate with nets	2	8	7	32.5632	0	0
39	-51.5948	0.944275	intermediate	1	intermediate with nets	2	9	10	4.67078	0	0
39	-51.5948	0.944275	intermediate	1	intermediate with nets	2	10	10	14.0459	0	0
39	-51.5948	0.944275	intermediate	1	intermediate with nets	2	11	10	7.6966	0	0
39	-51.5948	0.944275	intermediate	1	intermediate with nets	2	12	13	0.126969	0	0
39	-51.5948	0.944275	intermediate	1	intermediate with nets	2	13	13	0.0272106	0	0
39	-51.5948	0.944275	intermediate	1	intermediate with nets	2	14	13	1.66717	0	0
39	-51.5948	0.944275	intermediate	1	intermediate with nets	2	15	16	5.50033	0	0
39	-51.5948	0.944275	intermediate	1	intermediate with nets	2	16	16	10.0933	0	0
39	-51.5948	0.944275	intermediate	1	intermediate with nets	2	17	16	11.5397	0	0
39	-51.5948	0.944275	intermediate	1	intermediate with nets	3	6	7	1.151	1	0
39	-51.5948	0.944275	intermediate	1	intermediate with nets	3	7	7	22.0446	0	0
39	-51.5948	0.944275	intermediate	1	intermediate with nets	3	8	7	34.4964	0	0
39	-51.5948	0.944275	intermediate	1	intermediate with nets	3	9	10	7.03268	1	0
39	-51.5948	0.944275	intermediate	1	intermediate with nets	3	10	10	2.18105	0	0
39	-51.5948	0.944275	intermediate	1	intermediate with nets	3	11	10	5.804	0	0
39	-51.5948	0.944275	intermediate	1	intermediate with nets	3	12	13	4.97219	0	0
39	-51.5948	0.944275	intermediate	1	intermediate with nets	3	13	13	0.101	0	0
39	-51.5948	0.944275	intermediate	1	intermediate with nets	3	14	13	0.017	0	0
39	-51.5948	0.944275	intermediate	1	intermediate with nets	3	15	16	6.841	0	1
39	-51.5948	0.944275	intermediate	1	intermediate with nets	3	16	16	4.339	1	0
39	-51.5948	0.944275	intermediate	1	intermediate with nets	3	17	16	12.08	0	0
39	-51.5948	0.944275	intermediate	1	intermediate with nets	4	7	7	7.66111	0	0
39	-51.5948	0.944275	intermediate	1	intermediate with nets	4	8	7	24.6086	0	1
39	-51.5948	0.944275	intermediate	1	intermediate with nets	4	9	10	1.186	0	0
39	-51.5948	0.944275	intermediate	1	intermediate with nets	4	10	10	3.171	0	0
39	-51.5948	0.944275	intermediate	1	intermediate with nets	4	11	10	5.125	0	0
39	-51.5948	0.944275	intermediate	1	intermediate with nets	4	12	13	2.598	1	0
39	-51.5948	0.944275	intermediate	1	intermediate with nets	4	14	13	2.691	0	0
39	-51.5948	0.944275	intermediate	1	intermediate with nets	4	15	16	0.0975234	0	0
39	-51.5948	0.944275	intermediate	1	intermediate with nets	4	16	16	8.00308	0	0
40	-51.6053	0.972279	intermediate	1	intermediate with nets	1	7	7	12.7084	0	1
40	-51.6053	0.972279	intermediate	1	intermediate with nets	1	8	7	53.7614	0	0
40	-51.6053	0.972279	intermediate	1	intermediate with nets	1	9	10	28.5611	0	0
40	-51.6053	0.972279	intermediate	1	intermediate with nets	1	10	10	29.0319	0	0
40	-51.6053	0.972279	intermediate	1	intermediate with nets	1	11	10	15.2469	0	0
40	-51.6053	0.972279	intermediate	1	intermediate with nets	1	12	13	4.78214	0	0
40	-51.6053	0.972279	intermediate	1	intermediate with nets	1	13	13	23.5252	0	1
40	-51.6053	0.972279	intermediate	1	intermediate with nets	1	14	13	19.1912	0	0
40	-51.6053	0.972279	intermediate	1	intermediate with nets	1	15	16	28.6025	0	0
40	-51.6053	0.972279	intermediate	1	intermediate with nets	1	16	16	15.7669	0	0
40	-51.6053	0.972279	intermediate	1	intermediate with nets	1	17	16	19.3582	0	0
40	-51.6053	0.972279	intermediate	1	intermediate with nets	2	8	7	24.4042	0	0
40	-51.6053	0.972279	intermediate	1	intermediate with nets	2	9	10	13.0648	0	0
40	-51.6053	0.972279	intermediate	1	intermediate with nets	2	10	10	11.5306	1	0
40	-51.6053	0.972279	intermediate	1	intermediate with nets	2	11	10	5.74909	0	0
40	-51.6053	0.972279	intermediate	1	intermediate with nets	2	12	13	0.578334	0	0
40	-51.6053	0.972279	intermediate	1	intermediate with nets	2	13	13	4.85338	0	0
40	-51.6053	0.972279	intermediate	1	intermediate with nets	2	14	13	4.98737	0	0
40	-51.6053	0.972279	intermediate	1	intermediate with nets	2	15	16	8.19349	0	0
40	-51.6053	0.972279	intermediate	1	intermediate with nets	2	16	16	16.0433	0	0
40	-51.6053	0.972279	intermediate	1	intermediate with nets	2	17	16	6.87425	0	0
40	-51.6053	0.972279	intermediate	1	intermediate with nets	3	7	7	12.314	0	0
40	-51.6053	0.972279	intermediate	1	intermediate with nets	3	8	7	38.8735	0	0
40	-51.6053	0.972279	intermediate	1	intermediate with nets	3	9	10	15.6986	0	0
40	-51.6053	0.972279	intermediate	1	intermediate with nets	3	10	10	5.10942	0	0
40	-51.6053	0.972279	intermediate	1	intermediate with nets	3	11	10	0.122	0	0
40	-51.6053	0.972279	intermediate	1	intermediate with nets	3	12	13	3.51671	0	0
40	-51.6053	0.972279	intermediate	1	intermediate with nets	3	13	13	2.98828	0	0
40	-51.6053	0.972279	intermediate	1	intermediate with nets	3	15	16	8.173	0	0
40	-51.6053	0.972279	intermediate	1	intermediate with nets	3	16	16	10.663	0	0
40	-51.6053	0.972279	intermediate	1	intermediate with nets	3	17	16	4.61	0	0
40	-51.6053	0.972279	intermediate	1	intermediate with nets	4	7	7	10.816	0	0
40	-51.6053	0.972279	intermediate	1	intermediate with nets	4	8	7	22.3111	0	0
40	-51.6053	0.972279	intermediate	1	intermediate with nets	4	9	10	9.39002	0	0
40	-51.6053	0.972279	intermediate	1	intermediate with nets	4	10	10	7.558	0	0
40	-51.6053	0.972279	intermediate	1	intermediate with nets	4	11	10	2.43	0	0
40	-51.6053	0.972279	intermediate	1	intermediate with nets	4	12	13	3.136	0	0
40	-51.6053	0.972279	intermediate	1	intermediate with nets	4	15	16	0.717895	0	0
40	-51.6053	0.972279	intermediate	1	intermediate with nets	4	16	16	11.3304	0	0
40	-51.6053	0.972279	intermediate	1	intermediate with nets	4	17	16	4.284	0	0
41	-51.5953	0.992959	intermediate	1	intermediate with nets	1	7	7	12.1282	0	0
41	-51.5953	0.992959	intermediate	1	intermediate with nets	1	8	7	24.2718	0	0
41	-51.5953	0.992959	intermediate	1	intermediate with nets	1	9	10	44.1349	0	1
41	-51.5953	0.992959	intermediate	1	intermediate with nets	1	10	10	28.6032	0	1
41	-51.5953	0.992959	intermediate	1	intermediate with nets	1	11	10	25.4663	0	0
41	-51.5953	0.992959	intermediate	1	intermediate with nets	1	12	13	6.04871	0	0
41	-51.5953	0.992959	intermediate	1	intermediate with nets	1	13	13	20.3191	0	0
41	-51.5953	0.992959	intermediate	1	intermediate with nets	1	14	13	34.9936	1	1
41	-51.5953	0.992959	intermediate	1	intermediate with nets	1	15	16	31.0104	0	0
41	-51.5953	0.992959	intermediate	1	intermediate with nets	1	16	16	29.7123	1	0
41	-51.5953	0.992959	intermediate	1	intermediate with nets	1	17	16	9.81571	0	0
41	-51.5953	0.992959	intermediate	1	intermediate with nets	2	7	7	0.0757909	0	0
41	-51.5953	0.992959	intermediate	1	intermediate with nets	2	8	7	6.16164	0	0
41	-51.5953	0.992959	intermediate	1	intermediate with nets	2	9	10	28.415	0	1
41	-51.5953	0.992959	intermediate	1	intermediate with nets	2	10	10	10.8624	0	0
41	-51.5953	0.992959	intermediate	1	intermediate with nets	2	11	10	2.53013	0	0
41	-51.5953	0.992959	intermediate	1	intermediate with nets	2	12	13	2.4696	0	0
41	-51.5953	0.992959	intermediate	1	intermediate with nets	2	13	13	1.70822	0	0
41	-51.5953	0.992959	intermediate	1	intermediate with nets	2	14	13	14.9965	1	0
41	-51.5953	0.992959	intermediate	1	intermediate with nets	2	15	16	7.06795	0	0
41	-51.5953	0.992959	intermediate	1	intermediate with nets	2	16	16	15.5039	0	0
41	-51.5953	0.992959	intermediate	1	intermediate with nets	3	7	7	10.215	0	0
41	-51.5953	0.992959	intermediate	1	intermediate with nets	3	8	7	19.8037	0	0
41	-51.5953	0.992959	intermediate	1	intermediate with nets	3	9	10	33.177	0	0
41	-51.5953	0.992959	intermediate	1	intermediate with nets	3	10	10	7.4576	0	0
41	-51.5953	0.992959	intermediate	1	intermediate with nets	3	11	10	0.969911	0	0
41	-51.5953	0.992959	intermediate	1	intermediate with nets	3	13	13	4.28994	0	0
41	-51.5953	0.992959	intermediate	1	intermediate with nets	3	14	13	6.09889	0	0
41	-51.5953	0.992959	intermediate	1	intermediate with nets	3	15	16	6.332	0	0
41	-51.5953	0.992959	intermediate	1	intermediate with nets	3	16	16	11.6304	0	0
41	-51.5953	0.992959	intermediate	1	intermediate with nets	4	7	7	6.646	0	0
41	-51.5953	0.992959	intermediate	1	intermediate with nets	4	8	7	16.032	0	0
41	-51.5953	0.992959	intermediate	1	intermediate with nets	4	9	10	25.8072	1	0
41	-51.5953	0.992959	intermediate	1	intermediate with nets	4	10	10	10.3886	0	0
41	-51.5953	0.992959	intermediate	1	intermediate with nets	4	11	10	4.521	0	0
41	-51.5953	0.992959	intermediate	1	intermediate with nets	4	15	16	2.44735	0	0
41	-51.5953	0.992959	intermediate	1	intermediate with nets	4	16	16	4.306	0	0
41	-51.5953	0.992959	intermediate	1	intermediate with nets	4	17	16	10.762	0	0
42	-51.5858	1.02046	few	1	few	1	6	7	0.0163303	0	0
42	-51.5858	1.02046	few	1	few	1	7	7	8.67624	0	0
42	-51.5858	1.02046	few	1	few	1	8	7	22.2514	1	0
42	-51.5858	1.02046	few	1	few	1	9	10	52.1372	1	0
42	-51.5858	1.02046	few	1	few	1	10	10	49.3963	1	0
42	-51.5858	1.02046	few	1	few	1	11	10	25.0833	1	0
42	-51.5858	1.02046	few	1	few	1	12	13	14.0066	0	0
42	-51.5858	1.02046	few	1	few	1	13	13	21.744	0	0
42	-51.5858	1.02046	few	1	few	1	14	13	21.23	0	0
42	-51.5858	1.02046	few	1	few	1	15	16	22.2737	0	0
42	-51.5858	1.02046	few	1	few	1	16	16	34.4845	0	0
42	-51.5858	1.02046	few	1	few	2	8	7	3.72984	0	0
42	-51.5858	1.02046	few	1	few	2	9	10	23.2457	0	1
42	-51.5858	1.02046	few	1	few	2	10	10	15.5487	0	0
42	-51.5858	1.02046	few	1	few	2	11	10	5.02689	0	0
42	-51.5858	1.02046	few	1	few	2	12	13	4.94463	0	0
42	-51.5858	1.02046	few	1	few	2	13	13	6.34107	0	0
42	-51.5858	1.02046	few	1	few	2	14	13	8.49793	0	1
42	-51.5858	1.02046	few	1	few	2	15	16	17.6476	0	0
42	-51.5858	1.02046	few	1	few	2	16	16	3.41986	0	0
42	-51.5858	1.02046	few	1	few	3	7	7	3.891	0	0
42	-51.5858	1.02046	few	1	few	3	8	7	11.552	0	0
42	-51.5858	1.02046	few	1	few	3	9	10	31.4425	0	0
42	-51.5858	1.02046	few	1	few	3	10	10	18.5771	0	0
42	-51.5858	1.02046	few	1	few	3	11	10	3.20646	0	0
42	-51.5858	1.02046	few	1	few	3	13	13	2.90843	0	0
42	-51.5858	1.02046	few	1	few	3	14	13	9.38086	0	0
42	-51.5858	1.02046	few	1	few	3	15	16	14.6807	1	0
42	-51.5858	1.02046	few	1	few	3	16	16	5.28862	0	0
42	-51.5858	1.02046	few	1	few	4	7	7	0.658	0	0
42	-51.5858	1.02046	few	1	few	4	8	7	20.488	0	0
42	-51.5858	1.02046	few	1	few	4	9	10	23.052	0	0
42	-51.5858	1.02046	few	1	few	4	10	10	19.1459	0	0
42	-51.5858	1.02046	few	1	few	4	11	10	4.91899	0	0
42	-51.5858	1.02046	few	1	few	4	14	13	0.0858746	0	0
42	-51.5858	1.02046	few	1	few	4	15	16	7.23001	0	0
42	-51.5858	1.02046	few	1	few	4	16	16	4.813	0	0
42	-51.5858	1.02046	few	1	few	4	17	16	4.934	0	0
43	-51.5611	1.04787	few	1	few	1	8	7	31.5086	0	1
43	-51.5611	1.04787	few	1	few	1	9	10	27.8976	0	0
43	-51.5611	1.04787	few	1	few	1	10	10	61.1271	0	1
43	-51.5611	1.04787	few	1	few	1	11	10	49.0143	0	0
43	-51.5611	1.04787	few	1	few	1	12	13	15.0871	0	0
43	-51.5611	1.04787	few	1	few	1	13	13	22.8313	0	0
43	-51.5611	1.04787	few	1	few	1	14	13	29.5129	0	0
43	-51.5611	1.04787	few	1	few	1	15	16	37.9888	0	1
43	-51.5611	1.04787	few	1	few	1	16	16	3.45508	1	0
43	-51.5611	1.04787	few	1	few	2	7	7	2.06103	1	0
43	-51.5611	1.04787	few	1	few	2	8	7	6.00387	0	0
43	-51.5611	1.04787	few	1	few	2	9	10	6.99439	0	0
43	-51.5611	1.04787	few	1	few	2	10	10	22.4124	0	0
43	-51.5611	1.04787	few	1	few	2	11	10	17.9135	0	0
43	-51.5611	1.04787	few	1	few	2	12	13	25.2836	0	0
43	-51.5611	1.04787	few	1	few	2	13	13	8.69438	0	0
43	-51.5611	1.04787	few	1	few	2	14	13	4.13325	1	0
43	-51.5611	1.04787	few	1	few	2	15	16	19.1356	1	1
43	-51.5611	1.04787	few	1	few	2	16	16	2.52631	0	0
43	-51.5611	1.04787	few	1	few	3	8	7	15.4417	0	0
43	-51.5611	1.04787	few	1	few	3	9	10	30.6419	0	0
43	-51.5611	1.04787	few	1	few	3	10	10	35.9357	0	0
43	-51.5611	1.04787	few	1	few	3	11	10	15.0913	0	0
43	-51.5611	1.04787	few	1	few	3	12	13	2.62786	0	0
43	-51.5611	1.04787	few	1	few	3	13	13	0.616	0	0
43	-51.5611	1.04787	few	1	few	3	14	13	3.74947	0	0
43	-51.5611	1.04787	few	1	few	3	15	16	17.0697	0	1
43	-51.5611	1.04787	few	1	few	3	16	16	11.456	0	0
43	-51.5611	1.04787	few	1	few	3	17	16	0.848	0	0
43	-51.5611	1.04787	few	1	few	4	7	7	0.26	0	0
43	-51.5611	1.04787	few	1	few	4	8	7	6.994	0	0
43	-51.5611	1.04787	few	1	few	4	9	10	26.1682	0	0
43	-51.5611	1.04787	few	1	few	4	10	10	30.0014	0	0
43	-51.5611	1.04787	few	1	few	4	11	10	10.8481	0	0
43	-51.5611	1.04787	few	1	few	4	12	13	5.77923	0	0
43	-51.5611	1.04787	few	1	few	4	13	13	2.24061	0	0
43	-51.5611	1.04787	few	1	few	4	14	13	10.0292	0	0
43	-51.5611	1.04787	few	1	few	4	15	16	1.839	0	0
43	-51.5611	1.04787	few	1	few	4	16	16	5.092	0	0
43	-51.5611	1.04787	few	1	few	4	17	16	0.681	0	0
44	-51.527	1.04928	intermediate	0	intermediate no nets	1	7	7	10.9325	1	0
44	-51.527	1.04928	intermediate	0	intermediate no nets	1	8	7	22.4044	0	0
44	-51.527	1.04928	intermediate	0	intermediate no nets	1	9	10	26.4259	0	0
44	-51.527	1.04928	intermediate	0	intermediate no nets	1	10	10	30.4611	1	1
44	-51.527	1.04928	intermediate	0	intermediate no nets	1	11	10	35.0092	1	0
44	-51.527	1.04928	intermediate	0	intermediate no nets	1	12	13	33.8306	0	0
44	-51.527	1.04928	intermediate	0	intermediate no nets	1	13	13	28.1299	1	0
44	-51.527	1.04928	intermediate	0	intermediate no nets	1	14	13	39.9687	1	0
44	-51.527	1.04928	intermediate	0	intermediate no nets	1	15	16	19.3423	0	0
44	-51.527	1.04928	intermediate	0	intermediate no nets	1	16	16	11.7351	0	0
44	-51.527	1.04928	intermediate	0	intermediate no nets	1	17	16	1.2064	0	0
44	-51.527	1.04928	intermediate	0	intermediate no nets	2	7	7	0.667526	0	0
44	-51.527	1.04928	intermediate	0	intermediate no nets	2	8	7	3.01757	0	0
44	-51.527	1.04928	intermediate	0	intermediate no nets	2	9	10	3.79611	0	0
44	-51.527	1.04928	intermediate	0	intermediate no nets	2	10	10	7.59707	0	0
44	-51.527	1.04928	intermediate	0	intermediate no nets	2	11	10	14.413	0	0
44	-51.527	1.04928	intermediate	0	intermediate no nets	2	12	13	10.3536	0	0
44	-51.527	1.04928	intermediate	0	intermediate no nets	2	13	13	17.3231	0	0
44	-51.527	1.04928	intermediate	0	intermediate no nets	2	14	13	16.2623	0	1
44	-51.527	1.04928	intermediate	0	intermediate no nets	2	15	16	5.07681	0	0
44	-51.527	1.04928	intermediate	0	intermediate no nets	2	16	16	1.11794	0	0
44	-51.527	1.04928	intermediate	0	intermediate no nets	3	8	7	14.9267	0	0
44	-51.527	1.04928	intermediate	0	intermediate no nets	3	9	10	18.7183	0	0
44	-51.527	1.04928	intermediate	0	intermediate no nets	3	10	10	25.4767	0	0
44	-51.527	1.04928	intermediate	0	intermediate no nets	3	11	10	21.9276	0	0
44	-51.527	1.04928	intermediate	0	intermediate no nets	3	12	13	4.9316	0	0
44	-51.527	1.04928	intermediate	0	intermediate no nets	3	13	13	5.60012	0	0
44	-51.527	1.04928	intermediate	0	intermediate no nets	3	14	13	8.211	1	0
44	-51.527	1.04928	intermediate	0	intermediate no nets	3	15	16	3.848	0	0
44	-51.527	1.04928	intermediate	0	intermediate no nets	3	16	16	8.357	0	0
44	-51.527	1.04928	intermediate	0	intermediate no nets	4	8	7	5.128	0	0
44	-51.527	1.04928	intermediate	0	intermediate no nets	4	9	10	13.6911	0	0
44	-51.527	1.04928	intermediate	0	intermediate no nets	4	10	10	15.2336	0	1
44	-51.527	1.04928	intermediate	0	intermediate no nets	4	11	10	20.2504	0	0
44	-51.527	1.04928	intermediate	0	intermediate no nets	4	12	13	4.804	0	0
44	-51.527	1.04928	intermediate	0	intermediate no nets	4	13	13	14.4012	0	0
44	-51.527	1.04928	intermediate	0	intermediate no nets	4	14	13	6.08929	0	0
44	-51.527	1.04928	intermediate	0	intermediate no nets	4	15	16	2.772	0	0
44	-51.527	1.04928	intermediate	0	intermediate no nets	4	16	16	3.426	1	0
45	-51.5076	1.06654	few	0	few	1	7	7	4.14629	0	0
45	-51.5076	1.06654	few	0	few	1	8	7	13.1061	0	0
45	-51.5076	1.06654	few	0	few	1	9	10	34.3439	0	1
45	-51.5076	1.06654	few	0	few	1	10	10	15.8021	1	0
45	-51.5076	1.06654	few	0	few	1	11	10	36.4497	0	0
45	-51.5076	1.06654	few	0	few	1	12	13	12.2398	0	0
45	-51.5076	1.06654	few	0	few	1	13	13	45.8579	1	0
45	-51.5076	1.06654	few	0	few	1	14	13	29.131	0	0
45	-51.5076	1.06654	few	0	few	1	15	16	9.65808	0	0
45	-51.5076	1.06654	few	0	few	1	16	16	10.3878	0	0
45	-51.5076	1.06654	few	0	few	1	17	16	0.756494	0	0
45	-51.5076	1.06654	few	0	few	2	7	7	0.638379	0	0
45	-51.5076	1.06654	few	0	few	2	8	7	1.15064	0	0
45	-51.5076	1.06654	few	0	few	2	9	10	3.81545	0	0
45	-51.5076	1.06654	few	0	few	2	10	10	1.89663	0	1
45	-51.5076	1.06654	few	0	few	2	11	10	7.12642	0	0
45	-51.5076	1.06654	few	0	few	2	12	13	4.83774	0	0
45	-51.5076	1.06654	few	0	few	2	13	13	19.9249	0	0
45	-51.5076	1.06654	few	0	few	2	14	13	16.1132	0	0
45	-51.5076	1.06654	few	0	few	3	8	7	0.155949	0	0
45	-51.5076	1.06654	few	0	few	3	9	10	20.2668	0	0
45	-51.5076	1.06654	few	0	few	3	10	10	23.8914	0	0
45	-51.5076	1.06654	few	0	few	3	11	10	17.9592	0	0
45	-51.5076	1.06654	few	0	few	3	12	13	5.93253	0	0
45	-51.5076	1.06654	few	0	few	3	13	13	9.30957	0	0
45	-51.5076	1.06654	few	0	few	3	14	13	10.166	0	0
45	-51.5076	1.06654	few	0	few	3	15	16	5.622	0	0
45	-51.5076	1.06654	few	0	few	3	16	16	4.711	0	0
45	-51.5076	1.06654	few	0	few	4	8	7	3.866	0	0
45	-51.5076	1.06654	few	0	few	4	9	10	3.515	0	0
45	-51.5076	1.06654	few	0	few	4	10	10	20.7182	0	1
45	-51.5076	1.06654	few	0	few	4	11	10	18.4292	0	1
45	-51.5076	1.06654	few	0	few	4	12	13	4.89241	0	0
45	-51.5076	1.06654	few	0	few	4	13	13	17.6676	0	0
45	-51.5076	1.06654	few	0	few	4	14	13	3.96558	0	0
45	-51.5076	1.06654	few	0	few	4	15	16	4.749	0	0
45	-51.5076	1.06654	few	0	few	4	16	16	0.624	0	0
46	-51.486	1.08643	few	0	few	1	7	7	4.31134	0	0
46	-51.486	1.08643	few	0	few	1	8	7	20.4286	1	0
46	-51.486	1.08643	few	0	few	1	9	10	6.84785	0	0
46	-51.486	1.08643	few	0	few	1	10	10	38.4139	0	1
46	-51.486	1.08643	few	0	few	1	11	10	24.2056	1	0
46	-51.486	1.08643	few	0	few	1	12	13	20.822	0	0
46	-51.486	1.08643	few	0	few	1	13	13	19.8658	0	0
46	-51.486	1.08643	few	0	few	1	14	13	19.4912	0	0
46	-51.486	1.08643	few	0	few	1	15	16	29.5046	0	0
46	-51.486	1.08643	few	0	few	1	16	16	9.60441	0	0
46	-51.486	1.08643	few	0	few	1	17	16	0.339652	0	0
46	-51.486	1.08643	few	0	few	2	8	7	0.67371	0	0
46	-51.486	1.08643	few	0	few	2	9	10	1.021	0	0
46	-51.486	1.08643	few	0	few	2	10	10	2.99342	0	0
46	-51.486	1.08643	few	0	few	2	11	10	4.808	0	0
46	-51.486	1.08643	few	0	few	2	12	13	9.85552	0	0
46	-51.486	1.08643	few	0	few	2	13	13	12.0194	0	0
46	-51.486	1.08643	few	0	few	2	14	13	7.93717	0	0
46	-51.486	1.08643	few	0	few	2	15	16	2.5923	0	0
46	-51.486	1.08643	few	0	few	3	9	10	5.5447	0	0
46	-51.486	1.08643	few	0	few	3	10	10	24.1184	0	0
46	-51.486	1.08643	few	0	few	3	11	10	28.0283	0	0
46	-51.486	1.08643	few	0	few	3	12	13	1.9921	0	0
46	-51.486	1.08643	few	0	few	3	13	13	13.3138	0	0
46	-51.486	1.08643	few	0	few	3	14	13	15.6015	0	0
46	-51.486	1.08643	few	0	few	3	15	16	8.285	0	0
46	-51.486	1.08643	few	0	few	4	9	10	5.257	0	0
46	-51.486	1.08643	few	0	few	4	10	10	10.4023	0	0
46	-51.486	1.08643	few	0	few	4	11	10	7.9125	0	0
46	-51.486	1.08643	few	0	few	4	12	13	6.273	0	0
46	-51.486	1.08643	few	0	few	4	13	13	20.6087	0	0
46	-51.486	1.08643	few	0	few	4	14	13	6.93662	0	0
46	-51.486	1.08643	few	0	few	4	15	16	5.996	0	0
46	-51.486	1.08643	few	0	few	4	16	16	1.178	0	0
47	-51.4553	1.11143	few	0	few	1	7	7	3.72525	0	0
47	-51.4553	1.11143	few	0	few	1	8	7	21.695	1	0
47	-51.4553	1.11143	few	0	few	1	9	10	24.9266	1	0
47	-51.4553	1.11143	few	0	few	1	10	10	13.7286	1	0
47	-51.4553	1.11143	few	0	few	1	11	10	4.32975	0	0
47	-51.4553	1.11143	few	0	few	1	12	13	3.49558	0	0
47	-51.4553	1.11143	few	0	few	1	13	13	21.4313	0	0
47	-51.4553	1.11143	few	0	few	1	14	13	19.7457	0	0
47	-51.4553	1.11143	few	0	few	1	15	16	10.922	0	0
47	-51.4553	1.11143	few	0	few	1	16	16	8.7527	0	0
47	-51.4553	1.11143	few	0	few	1	17	16	0.0123373	0	0
47	-51.4553	1.11143	few	0	few	2	9	10	3.26385	0	0
47	-51.4553	1.11143	few	0	few	2	10	10	7.75097	0	0
47	-51.4553	1.11143	few	0	few	2	11	10	0.689	0	0
47	-51.4553	1.11143	few	0	few	2	12	13	2.21381	0	0
47	-51.4553	1.11143	few	0	few	2	14	13	2.22557	0	0
47	-51.4553	1.11143	few	0	few	2	15	16	3.84131	0	0
47	-51.4553	1.11143	few	0	few	3	8	7	0.278	0	0
47	-51.4553	1.11143	few	0	few	3	9	10	17.6765	0	0
47	-51.4553	1.11143	few	0	few	3	10	10	9.93239	0	0
47	-51.4553	1.11143	few	0	few	3	11	10	14.4248	0	0
47	-51.4553	1.11143	few	0	few	3	12	13	14.143	0	0
47	-51.4553	1.11143	few	0	few	3	13	13	15.4445	0	0
47	-51.4553	1.11143	few	0	few	3	14	13	1.71276	0	0
47	-51.4553	1.11143	few	0	few	3	15	16	5.327	0	0
47	-51.4553	1.11143	few	0	few	4	9	10	6.68562	1	0
47	-51.4553	1.11143	few	0	few	4	10	10	9.43281	0	0
47	-51.4553	1.11143	few	0	few	4	11	10	8.56808	1	0
47	-51.4553	1.11143	few	0	few	4	12	13	3.79444	0	0
47	-51.4553	1.11143	few	0	few	4	13	13	7.78581	1	0
47	-51.4553	1.11143	few	0	few	4	14	13	18.8051	0	0
47	-51.4553	1.11143	few	0	few	4	15	16	1.772	0	0
48	-51.4481	1.14846	few	0	few	1	7	7	12.8286	0	0
48	-51.4481	1.14846	few	0	few	1	8	7	22.3107	0	0
48	-51.4481	1.14846	few	0	few	1	9	10	27.2473	0	0
48	-51.4481	1.14846	few	0	few	1	10	10	6.70828	0	0
48	-51.4481	1.14846	few	0	few	1	11	10	3.51527	0	0
48	-51.4481	1.14846	few	0	few	1	12	13	5.9625	0	0
48	-51.4481	1.14846	few	0	few	1	13	13	9.85763	0	0
48	-51.4481	1.14846	few	0	few	1	14	13	10.9411	0	0
48	-51.4481	1.14846	few	0	few	1	15	16	12.6114	0	0
48	-51.4481	1.14846	few	0	few	1	16	16	1.93744	0	0
48	-51.4481	1.14846	few	0	few	2	7	7	1.88819	0	0
48	-51.4481	1.14846	few	0	few	2	8	7	1.69085	0	0
48	-51.4481	1.14846	few	0	few	2	10	10	4.96833	0	0
48	-51.4481	1.14846	few	0	few	2	11	10	4.5661	0	0
48	-51.4481	1.14846	few	0	few	2	16	16	1.28633	0	0
48	-51.4481	1.14846	few	0	few	3	9	10	9.28404	0	0
48	-51.4481	1.14846	few	0	few	3	10	10	8.67567	0	0
48	-51.4481	1.14846	few	0	few	3	11	10	12.0598	0	0
48	-51.4481	1.14846	few	0	few	3	12	13	7.17235	0	0
48	-51.4481	1.14846	few	0	few	3	13	13	20.6865	0	0
48	-51.4481	1.14846	few	0	few	3	14	13	7.09883	0	0
48	-51.4481	1.14846	few	0	few	3	15	16	0.89	0	0
48	-51.4481	1.14846	few	0	few	4	10	10	10.9723	0	0
48	-51.4481	1.14846	few	0	few	4	11	10	9.78062	0	0
48	-51.4481	1.14846	few	0	few	4	12	13	4.94887	1	0
48	-51.4481	1.14846	few	0	few	4	13	13	9.5665	0	0
48	-51.4481	1.14846	few	0	few	4	14	13	3.74391	0	0
48	-51.4481	1.14846	few	0	few	4	15	16	4.86715	0	0
49	-51.4351	1.18811	few	0	few	1	6	7	1.386	0	0
49	-51.4351	1.18811	few	0	few	1	7	7	10.7702	1	0
49	-51.4351	1.18811	few	0	few	1	8	7	19.7143	0	0
49	-51.4351	1.18811	few	0	few	1	9	10	15.5496	0	0
49	-51.4351	1.18811	few	0	few	1	10	10	5.18721	0	0
49	-51.4351	1.18811	few	0	few	1	11	10	19.3881	0	0
49	-51.4351	1.18811	few	0	few	1	12	13	3.10914	0	0
49	-51.4351	1.18811	few	0	few	1	13	13	2.13829	0	0
49	-51.4351	1.18811	few	0	few	1	14	13	7.92011	0	0
49	-51.4351	1.18811	few	0	few	1	15	16	9.39256	0	1
49	-51.4351	1.18811	few	0	few	1	16	16	2.29589	1	0
49	-51.4351	1.18811	few	0	few	2	8	7	2.49811	0	1
49	-51.4351	1.18811	few	0	few	2	9	10	2.92517	0	0
49	-51.4351	1.18811	few	0	few	2	11	10	3.25133	0	0
49	-51.4351	1.18811	few	0	few	2	12	13	2.22105	0	0
49	-51.4351	1.18811	few	0	few	3	9	10	1.55	0	0
49	-51.4351	1.18811	few	0	few	3	10	10	12.8925	0	0
49	-51.4351	1.18811	few	0	few	3	11	10	9.08733	0	0
49	-51.4351	1.18811	few	0	few	3	12	13	6.69584	0	0
49	-51.4351	1.18811	few	0	few	3	13	13	8.08111	1	0
49	-51.4351	1.18811	few	0	few	3	14	13	5.113	0	0
49	-51.4351	1.18811	few	0	few	4	9	10	2.31	0	0
49	-51.4351	1.18811	few	0	few	4	10	10	4.69543	0	0
49	-51.4351	1.18811	few	0	few	4	11	10	10.8978	0	0
49	-51.4351	1.18811	few	0	few	4	12	13	1.094	0	0
49	-51.4351	1.18811	few	0	few	4	13	13	8.0778	1	0
49	-51.4351	1.18811	few	0	few	4	14	13	6.1955	0	0
49	-51.4351	1.18811	few	0	few	4	15	16	1.27465	0	0
49	-51.4351	1.18811	few	0	few	4	16	16	1.421	0	0
50	-51.4449	1.23007	few	0	few	1	7	7	6.51245	0	0
50	-51.4449	1.23007	few	0	few	1	8	7	14.8575	0	0
50	-51.4449	1.23007	few	0	few	1	9	10	6.04385	0	0
50	-51.4449	1.23007	few	0	few	1	10	10	24.244	0	0
50	-51.4449	1.23007	few	0	few	1	11	10	5.83078	0	0
50	-51.4449	1.23007	few	0	few	1	12	13	0.726647	0	0
50	-51.4449	1.23007	few	0	few	1	13	13	9.29965	0	0
50	-51.4449	1.23007	few	0	few	1	14	13	11.783	0	1
50	-51.4449	1.23007	few	0	few	1	15	16	2.26653	0	0
50	-51.4449	1.23007	few	0	few	2	9	10	0.914378	0	0
50	-51.4449	1.23007	few	0	few	2	10	10	4.54859	0	0
50	-51.4449	1.23007	few	0	few	2	12	13	1.59085	0	0
50	-51.4449	1.23007	few	0	few	2	13	13	3.71135	0	0
50	-51.4449	1.23007	few	0	few	3	10	10	2.45332	0	0
50	-51.4449	1.23007	few	0	few	3	11	10	14.7254	0	0
50	-51.4449	1.23007	few	0	few	3	12	13	1.7509	0	0
50	-51.4449	1.23007	few	0	few	3	13	13	7.49132	0	0
50	-51.4449	1.23007	few	0	few	3	15	16	0.793	0	0
50	-51.4449	1.23007	few	0	few	4	9	10	4.127	0	0
50	-51.4449	1.23007	few	0	few	4	10	10	6.48685	0	0
50	-51.4449	1.23007	few	0	few	4	11	10	3.98787	0	0
50	-51.4449	1.23007	few	0	few	4	12	13	0.462029	0	0
50	-51.4449	1.23007	few	0	few	4	13	13	2.0773	0	0
50	-51.4449	1.23007	few	0	few	4	14	13	14.4962	0	0
50	-51.4449	1.23007	few	0	few	4	15	16	5.3937	0	0
51	-51.4335	1.25501	intermediate	0	intermediate no nets	1	6	7	1.45281	0	0
51	-51.4335	1.25501	intermediate	0	intermediate no nets	1	7	7	4.04807	0	0
51	-51.4335	1.25501	intermediate	0	intermediate no nets	1	8	7	8.97614	0	0
51	-51.4335	1.25501	intermediate	0	intermediate no nets	1	9	10	14.0061	0	0
51	-51.4335	1.25501	intermediate	0	intermediate no nets	1	10	10	13.7265	0	0
51	-51.4335	1.25501	intermediate	0	intermediate no nets	1	11	10	7.51995	0	0
51	-51.4335	1.25501	intermediate	0	intermediate no nets	1	12	13	4.90474	0	0
51	-51.4335	1.25501	intermediate	0	intermediate no nets	1	13	13	15.2523	0	0
51	-51.4335	1.25501	intermediate	0	intermediate no nets	1	14	13	0.606	0	0
51	-51.4335	1.25501	intermediate	0	intermediate no nets	1	15	16	9.91257	0	0
51	-51.4335	1.25501	intermediate	0	intermediate no nets	1	16	16	3.37552	0	0
51	-51.4335	1.25501	intermediate	0	intermediate no nets	2	10	10	5.41206	0	0
51	-51.4335	1.25501	intermediate	0	intermediate no nets	2	13	13	3.50124	0	0
51	-51.4335	1.25501	intermediate	0	intermediate no nets	2	14	13	1.83413	0	0
51	-51.4335	1.25501	intermediate	0	intermediate no nets	3	11	10	7.20472	0	0
51	-51.4335	1.25501	intermediate	0	intermediate no nets	3	12	13	7.97601	1	0
51	-51.4335	1.25501	intermediate	0	intermediate no nets	3	13	13	8.70342	0	0
51	-51.4335	1.25501	intermediate	0	intermediate no nets	3	14	13	0.425561	0	0
51	-51.4335	1.25501	intermediate	0	intermediate no nets	3	15	16	0.4	0	0
51	-51.4335	1.25501	intermediate	0	intermediate no nets	4	9	10	4.70852	0	0
51	-51.4335	1.25501	intermediate	0	intermediate no nets	4	10	10	5.57942	0	0
51	-51.4335	1.25501	intermediate	0	intermediate no nets	4	11	10	1.108	0	0
51	-51.4335	1.25501	intermediate	0	intermediate no nets	4	12	13	3.402	0	0
51	-51.4335	1.25501	intermediate	0	intermediate no nets	4	13	13	5.20881	0	0
51	-51.4335	1.25501	intermediate	0	intermediate no nets	4	14	13	6.028	0	0
51	-51.4335	1.25501	intermediate	0	intermediate no nets	4	15	16	11.974	0	0
52	-51.4	1.27645	few	0	few	1	7	7	4.27974	0	0
52	-51.4	1.27645	few	0	few	1	8	7	6.37688	0	0
52	-51.4	1.27645	few	0	few	1	9	10	3.81434	0	0
52	-51.4	1.27645	few	0	few	1	10	10	7.33763	0	0
52	-51.4	1.27645	few	0	few	1	11	10	5.88993	0	0
52	-51.4	1.27645	few	0	few	1	12	13	5.36398	0	0
52	-51.4	1.27645	few	0	few	1	13	13	6.36294	0	0
52	-51.4	1.27645	few	0	few	1	14	13	1.80039	0	0
52	-51.4	1.27645	few	0	few	1	15	16	4.10173	0	0
52	-51.4	1.27645	few	0	few	1	16	16	1.807	0	0
52	-51.4	1.27645	few	0	few	1	17	16	1.679	0	0
52	-51.4	1.27645	few	0	few	2	10	10	0.889853	0	0
52	-51.4	1.27645	few	0	few	2	11	10	2.27464	0	0
52	-51.4	1.27645	few	0	few	2	14	13	3.37679	0	0
52	-51.4	1.27645	few	0	few	3	11	10	1.83	0	0
52	-51.4	1.27645	few	0	few	3	12	13	13.8322	0	0
52	-51.4	1.27645	few	0	few	3	14	13	6.32953	0	0
52	-51.4	1.27645	few	0	few	4	7	7	0.678382	0	0
52	-51.4	1.27645	few	0	few	4	8	7	2.09881	0	0
52	-51.4	1.27645	few	0	few	4	9	10	6.11927	0	0
52	-51.4	1.27645	few	0	few	4	10	10	5.821	0	0
52	-51.4	1.27645	few	0	few	4	11	10	3.49	0	0
52	-51.4	1.27645	few	0	few	4	13	13	2.48797	0	0
52	-51.4	1.27645	few	0	few	4	14	13	5.91595	0	0
52	-51.4	1.27645	few	0	few	4	15	16	5.22235	0	0
52	-51.4	1.27645	few	0	few	4	16	16	3.79696	1	0
52	-51.4	1.27645	few	0	few	4	17	16	0.809	0	0
